# Supplementary material for: Differential CaKAN3-CaHSF8 associations underlie distinct immune and heat responses under high temperature and high humidity conditions
Source: PubMed Central journal article supplement (PMC10368638; doi:10.1038/s41467-023-40251-8), 2023-07-25
Supplement: 41467_2023_40251_MOESM1_ESM.pdf [file 41467_2023_40251_MOESM1_ESM.pdf]

1 Tables

2 Supplementary Data Table 1. Primers used in this study.

|                                                        | Gene                        | F primer                                                 | R primer                                                  |
|--------------------------------------------------------|-----------------------------|----------------------------------------------------------|-----------------------------------------------------------|
| Primers used for <i>CaKAN3</i> and <i>CaHSF8</i> study | <i>CaKAN3</i>               | GGGGACAAGTTTGTACAAAAAAGCAGGC<br>TTCATGATGGAATATTTCTCAAT  | GGGGACCACTTTGTACAAGAAAGCTGGGTC<br>TTAACAATAGAAATATGAAG    |
|                                                        | <i>CaKAN3-GFP</i>           | GGGGACAAGTTTGTACAAAAAAGCAGGC<br>TTCATGATGGAATATTTCTCAAT  | GGGGACCACTTTGTACAAGAAAGCTGGGTC<br>ACAATAGAAATATGAAG       |
|                                                        | <i>CaKAN3-VIGS</i>          | GGGGACAAGTTTGTACAAAAAAGCAGGC<br>TTC AAGGGAGAACAATATTTGGC | GGGGACCACTTTGTACAAGAAAGCTGGGTC<br>TTTCTACTAACCAAAGGAC     |
|                                                        | <i>CaHSF8-VIGS</i>          | GGGGACAAGTTTGTACAAAAAAGCAGGC<br>TTC TGAGTAGCTCAAATGCGCCA | GGGGACCACTTTGTACAAGAAAGCTGGGTC<br>TCTGTCCATGAGCAGGCTTG    |
|                                                        | <i>CaKAN4-GFP</i>           | GGGGACAAGTTTGTACAAAAAAGCAGGC<br>TTCATGATGAAAAAATATTCAT   | GGGGACCACTTTGTACAAGAAAGCTGGGTC<br>GGGAAAAGTTTCTTCAAAC     |
|                                                        | <i>CaHSF8</i>               | GGGGACAAGTTTGTACAAAAAAGCAGGC<br>TTCATGGGTTCTGCTTCAATGGA  | GGGGACCACTTTGTACAAGAAAGCTGGGTC<br>TCATACTTTTTACTGTTTG     |
|                                                        | <i>CaHSF8-GFP</i>           | GGGGACAAGTTTGTACAAAAAAGCAGGC<br>TTCATGGGTTCTGCTTCAATGGA  | GGGGACCACTTTGTACAAGAAAGCTGGGTC<br>TACTTTTTACTGTTTG        |
|                                                        | <i>CaHSF8-D1</i>            | GGGGACAAGTTTGTACAAAAAAGCAGGC<br>TTCATGGGTTCTGCTTCAATGGA  | GGGGACCACTTTGTACAAGAAAGCTGGGTC<br>TCAGCGCTACTAATATTTCTAA  |
|                                                        | <i>CaHSF8-D2</i>            | GGGGACAAGTTTGTACAAAAAAGCAGGC<br>TTCATGGGTTCTGCTTCAATGGA  | GGGGACCACTTTGTACAAGAAAGCTGGGTC<br>TCACAGTAACTTTCAGGACTGT  |
|                                                        | <i>CaHSF8-D3</i>            | GGGGACAAGTTTGTACAAAAAAGCAGGC<br>TTCATGGGTTCTGCTTCAATGGA  | GGGGACCACTTTGTACAAGAAAGCTGGGTC<br>GTTTTGAAGAACTTTTCCC     |
|                                                        | <i>CaKAN3<sup>myb</sup></i> | GGGGACAAGTTTGTACAAAAAAGCAGGC<br>TTCATGATGGAATATTTCTCAAT  | GGGGACCACTTTGTACAAGAAAGCTGGGTC<br>TTATCTGTACATCTGGAGATGGC |
|                                                        | <i>CaHSFA1-GFP</i>          | GGGGACAAGTTTGTACAAAAAAGCAGGC<br>TTCATGCCTTACACTTCCCTCT   | GGGGACCACTTTGTACAAGAAAGCTGGGTC<br>GTTTTGAAGAACTTTTCCC     |
| Primers used for pepper q-PCR analysis                 | <i>CaKAN3-qPCR</i>          | AATCATCAGTTCCTCGTCTT                                     | GTCAATCCCTTACTTCCATC                                      |
|                                                        | <i>CaHSF8-qPCR</i>          | TTGAAGAAGAGGTTGAGAGG                                     | TCGCTGCTCCATAATATGAA                                      |
|                                                        | <i>CaRIB23-qPCR</i>         | TGGCCTGGACACCACAATTT                                     | TGTTTTCCGGAAGACCCTCG                                      |
|                                                        | <i>CaRIB11-qPCR</i>         | GTACTIONCCCGTTGAGCCAC                                    | AGGTGTAGCTCTTGTCCAAC                                      |
|                                                        | <i>CaRIA-qPCR</i>           | AGCTACGACATGTGGACACC                                     | TCTGCTCTGCTGCTGAACAA                                      |

|                           |                                   |                            |                         |
|---------------------------|-----------------------------------|----------------------------|-------------------------|
|                           | <i>CaR1B12</i> -qPCR              | CCTAGACGTGACTTCCGAGC       | TCTTCCAACAATCGCAGCT     |
|                           | <i>CaR1A6</i> -qPCR               | TGTGCATGGGTCAGTGTCTC       | TCCAAGCCTCAGTACTCCA     |
|                           | <i>CaR1B16</i> -qPCR              | ATGACACGTCGAGCCCAAAT       | ACTACCACCAGCAACCATGG    |
|                           | <i>CaHSP17.4B</i> -qPCR           | TCAGCTTCATCAGATGCACCT      | TCGTGGCAAGCAATTCCTT     |
|                           | <i>CaHSP70</i> -qPCR              | GTGCAACTTCCGGTGGAATG       | GGACAGTAGGGGTGAGGGAA    |
|                           | <i>CaHSP18.2</i> -qPCR            | TGTGCAGTGACCCTTCAGAA       | CGACGATATTCCCCACAAAGC   |
|                           | <i>CaHSP70-15</i> -qPCR           | TGCTGAGCCAATGGAGATGG       | TGTTGACTGCTGCTGTAGGT    |
|                           | <i>CaPRP1</i> -qPCR <sup>1</sup>  | ACCAAACCTCGGATATTCCAAT     | GAGGAATCCTCGGAACCAAGT   |
|                           | <i>CaMgst3</i> -qPCR <sup>1</sup> | TCCAGCTTTTCGCACTCTCT       | CGAGATCTCGCCACCCAATT    |
|                           | <i>CaACTIN</i> -qPCR <sup>2</sup> | AGGGATGGGTCAAAAGGATGC      | GAGACAACACCGCTGAATAGC   |
|                           | <i>NbR1B23</i> -qPCR              | GATGATGCTTGCTCATCGCT       | ACGGCAGGTGACAGCTAAAA    |
|                           | <i>NbR1B11</i> -qPCR              | CCCTTCATGTTGGGGGACTC       | TATTGTGTGCCAGGCCACAT    |
|                           | <i>NbR1B12</i> -qPCR              | GAACCTACTCCC GCGAAG        | CCGGCCATTCCCATAATCGA    |
|                           | <i>NbR1A6</i> -qPCR               | AACGACGGGCTAATGGAAGG       | GAAAGCATAGCTCGCCGTTG    |
|                           | <i>NbR1B16</i> -qPCR              | ATGCCCGAGACGCTAACAAA       | CCTTGAGGGTCGGAAACTCC    |
|                           | <i>NbEF-1a</i> -qPCR <sup>2</sup> | TGCTGCTGTAACAAGATGGATGC    | GAGATGGGGACAAAGGGGATT   |
| Primers used for ChIP-PCR | p <i>CaR1B23</i> -P1              | AGTCCGGTGCCTAAAGCTC        | CCACAAGGGAGAAGGAAAATCC  |
|                           | p <i>CaR1B23</i> -P2              | TCCCTGATATCCCTGCATGAC      | CGGATTGTCACGGATGATGC    |
|                           | p <i>CaR1B23</i> -P3              | CCTTTGCTCTCTCCTTGCAGA      | TGCGAAGGTAAGAGCTTGA     |
|                           | p <i>CaR1B23</i> -HSE             | AGAAGGCATCATCCGTGACA       | AAGTGGTAGGTGCGTGATGA    |
|                           | p <i>CaR1B11</i> -P1              | CCGAACAGTCACTCCTTTTCC      | CCATTCACGTGGGGGATTGT    |
|                           | p <i>CaR1B11</i> -P2              | GGCTATTGTAACACCCCGCA       | TGCCCAACTAGATTACACACT   |
|                           | p <i>CaR1B11</i> -P3              | TGATGAACTTGGGGGCTTACT      | TGTTGGAGCAAAATGGGCAT    |
|                           | p <i>CaR1B11</i> -HSE             | CCGTCATTTCTAGAAGTAGATGTTCC | TGATCTCGAATCATGCCCAACT  |
|                           | p <i>CaR1A</i> -P1                | AGGTTGAACTGAATATTTTGTGCA   | TCACTGCTATGGAATCTTTCTCA |
|                           | p <i>CaR1A</i> -P2                | ATGAAATTGGGCTACACCGT       | ACCCTCTAATGATTGTGCGAA   |
|                           | p <i>CaR1A</i> -P3                | GGGTAATGCGCTCCCTAACA       | CAAGGATTGTGGGGGAGTAGT   |
|                           | p <i>CaR1A</i> -HSE               | CTCCCCACAATCCTTGTGTA       | ACCTTAATATGGCAGTGAGGACT |

|                              |                              |                            |
|------------------------------|------------------------------|----------------------------|
| pCaR1B12-P1                  | AGTTGGATATATAGTTTCCATCAGCA   | TGGTGTCAAGTTTAGGGTCGT      |
| pCaR1B12-P2                  | ACCTTTGATTTTGCAACTTCATGC     | ACCTCTCTCCAAGTCAGCCT       |
| pCaR1B12-P3                  | TGTGCACTGTCAAAGTTTAAGGT      | TGTGAACTCTTCAAACCCCTT      |
| pCaR1B12-P4                  | AAAGGGGTTTGAAGAGTTCACA       | TTAGTTTTGTGCTTTGCAACGA     |
| pCaR1B12-P5                  | TCTCCCAACAATCGCAGCT          | ACGTGACTCCGAGCAGTAG        |
| pCaR1B12-HSE                 | AGTTGGATATATAGTTTCCATCAGCA   | TGGTGTCAAGTTTAGGGTCGT      |
| pCaR1A6-P1                   | TGTCATCTTTTCATTTAGACTTTGTTGA | AGTTCATGGTCAAGTCATCCGT     |
| pCaR1A6-P2                   | TGTGCTTTGTCCGGGTAATG         | ACAAGCAATGCAAGACAGTGT      |
| pCaR1A6-P3                   | AGCAGGTCTCGAGTATTCCA         | CCTCCTGTGATCTAGCTGAGG      |
| pCaR1A6-HSE                  | GGGGGAAATGAAATTCCTAACCT      | CATTACCCGGAACAAAGCACA      |
| pCaR1B16-P1                  | TCTCAATTCTCACCACCACCA        | ACTGCACCTTAGGGGATCTTG      |
| pCaR1B16-P2                  | TGAAAACAATAACAAGATCCGACCT    | AGCTGAGTTCTGCTTTGGACA      |
| pCaR1B16-P3                  | ACAGCAATTACTCAACTATCCA       | CCTCATTGGTTGCTTGTGTGT      |
| pCaR1B16-P4                  | CACAAGCAACCAATGAGGAAA        | TCGGTTTTCGTTTGAAAGCACA     |
| pCaR1B16-P5                  | TGTGCTTTCAAACGAAAACCGA       | TGGCTGAAATTCTCATGCTTCC     |
| pCaR1B16-HSE                 | TGAAAACAATAACAAGATCCGACCT    | AGCTGAGTTCTGCTTTGGACA      |
| pCaMgst3-P1                  | AAGCTCCGTCGAAGTTTGC          | TCCGTTGACATTGTCCCCTT       |
| pCaMgst3-P2                  | TCGTTCTTGATAGCAGAACCA        | GCGAAACGAATAAATGTTTGTGCGA  |
| pCaMgst3-P3                  | TCCCGTTCTTACATTAAGTTAGTCT    | ACGAGTTAAGGACCCGTTTGG      |
| pCaMgst3-P4                  | TCCAGCTTTTCGCACTCTCT         | CGAGATCTCGCCACCCAATT       |
| pCaPRP1-P5                   | TTGTCGTGTTTGATCCTATC         | ACTACCGTAGTGGGAAATTTA      |
| pCaPRP1-P6                   | AGTCGAAAATTATTTCCGACAAGC     | GACGGCCAATGTAGTCGAA        |
| pCaPRP1-P7                   | CCTTTTAACGACGTGGCAC          | TGAACAAATATGACCTCCGATTTTGT |
| pCaHSP17.4B <sup>AACAA</sup> | CACAATTCGTGCCTACTTTAAGT      | AGTTCATCCCCTTACCGGG        |
| pCaHSP17.4B-HSE              | TGCTTCATGTCCCAATGCGA         | CGGCAAAAAGGGTTGAGCAA       |
| pCaHSP70 <sup>AACAA</sup>    | TCGAAATAACATTATGTGAAGGGTT    | TCTTCACATTTTAATTCGCAGTGT   |
| pCaHSP70-HSE                 | TCTTGCACTGCTTGGTCA           | TGCATGTGATGTGTACTGAGA      |
| pCaHSP18.2 <sup>AACAA</sup>  | ACAAAGCCAAGACCCACAAC         | AGTGCATGCAGATCAGCTGT       |
| pCaHSP18.2-HSE               | GTTTCACCGGATTTCGCTTT         | GTTGTGGGTCTTGGCTTTGT       |

|                          |                                  |                              |                             |
|--------------------------|----------------------------------|------------------------------|-----------------------------|
|                          | pCaHSP70-15 <sup>AACAA</sup>     | GCTATAAGGAGCCAAACACAGC       | ACATTATCCTGTTTACCAGAGGGG    |
|                          | pCaHSP70-15-HSE                  | TTTTCGGTCTGGCAATTCGC         | CGCTATCCTTTTTCTTTTTCTGTGC   |
|                          | pNbR1B23-P1                      | ACGATTTTGCTTTTAAAATTAAGCTGT  | ATTGCAGCAACCCAAAGCTC        |
|                          | pNbR1B23-P2                      | AGGAATCTCGTGCCACATGC         | CGAAGGAGAGATGATCTAGTTACCC   |
|                          | pNbR1B23-P3                      | TGATGCTGCTCTTTGTCCTT         | AGTTATCAGCTATCATTAAACCACTCA |
|                          | pNbR1B23-P4                      | CGTCTGCAACAACCTGGCAA         | TGAGGCTCTGCAAGTAGAGA        |
|                          | pNbR1B23-PH1                     | CAGTGGCTCTCCTTCTTCCC         | TGGTTAGAAGACATTCTTTTTCTGAGA |
|                          | pNbR1B11-P1                      | TTCCGAATTGCTCCGGCTAA         | TATCCTCCCCAGACCTCACG        |
|                          | pNbR1B11-P2                      | TGTTGTTTGACCATCGGCTT         | ACCTCAACCATAACTCACGAGG      |
|                          | pNbR1B11-P3                      | TGACAGAATGAGTTCCAAACCTG      | TCATTTCGGATTATGGAGAAGTCA    |
|                          | pNbR1B11-P4                      | GTCTGTTTCCTTTCACTTGACGG      | CCAGGGGTCTAGGAGGCTAA        |
|                          | pNbR1B11-PH2                     | TCAGTAATTTCCGGTTAAGTTGAGAAGT | ATTTTGATATTCGCGCGGGC        |
|                          | pNbR1B12-P1                      | TGGCACACAATCTCACTTTCTG       | ATCCGGGTATAGGTCAGGGG        |
|                          | pNbR1B12-P2                      | TGCGGGAATCTTATTACCCC         | AAAAATACATGTGGGGCGCG        |
|                          | pNbR1B12-P3                      | CGGCGACAGATTTTTATCCCG        | TTTGTCTTCTCTCCACACA         |
|                          | pNbR1B12-P4                      | GCTAAGGGTAAGGTCTGCGG         | CTGTTCCACAACAATAGCAGCA      |
|                          | pNbR1B12-PH3                     | TGTGTGGGAGGAAGAGCAAA         | AACCTTCCCACGCCGAAAAA        |
|                          | pNbR1A6-P1                       | GGAGCCCCTCATATCGAAGC         | CCATGATATCCGGTTGGGCA        |
|                          | pNbR1A6-P2                       | AGTGCAAGCTCGGAAGTAA          | GCGAGTTGGCATCGATTGTG        |
|                          | pNbR1A6-P3                       | CGGGTGGAAATCGAGGGAAAA        | TGATGCGCTCGGACGTAAAG        |
|                          | pNbR1A6-PH4                      | TAATATCCGTGCCCAACCGG         | TGGTATGCGTGTACGATGTG        |
|                          | pNbR1B16-P1                      | TGTAATGCTTGATGACAACGAACA     | GGGTAAAGTAGGATCACTTTCTGC    |
|                          | pNbR1B16-P2                      | TTGACCAACAAAGAGCTGGA         | TGCTAAAGTCACAGTAGTTTTGAAA   |
|                          | pNbR1B16-P3                      | ATCAGAGGCAGGATTTCCGC         | GCTTAGTGGTCAAGGGTTCA        |
|                          | pNbR1B16-P4                      | TGATCATGGACCTCAGCAAGT        | GGCAATAAGGGTGTGAAGCC        |
|                          | pNbR1B16-PH5                     | GCATAGACAGGTCTGCAAGT         | TCCTAGTTCATGCACCAAAACA      |
| Primers used<br>for EMSA | WT <sup>CaR1B23AACAA</sup> probe | CTCTTTGAAACAAGAAGGGA         | TCCCTTCTGTTTCAAAGAG         |
|                          | M <sup>CaR1B23AACAA</sup> probe  | CTCTTTGAAAAAAGAAGGGA         | TCCCTTCTTTTTCAAAGAG         |
|                          | WT <sup>CaR1B11AACAA</sup> probe | CGGGCTAGAACAAAACCGTC         | GACGGTTTTGTTCTAGCCCG        |

|                                      |                                        |                                           |
|--------------------------------------|----------------------------------------|-------------------------------------------|
| <b>M<sup>CaR1B11A</sup> probe</b>    | CGGGCTAGAAAAAACCGTC                    | GACGGTTTTTTTCTAGCCCG                      |
| <b>WT<sup>CaR1AA</sup> probe</b>     | TGCGCTCCCTAACAAAGGAG                   | CTCCTTTGTAGGGAGCGCA                       |
| <b>M<sup>CaR1AA</sup> probe</b>      | TGCGCTCCCTAAAAAGGAG                    | CTCCTTTTGTAGGGAGCGCA                      |
| <b>WT<sup>CaR1B12A</sup> probe</b>   | GAAAGAAATAACAAGAGTTA                   | TAACCTTGTATTTCCTTC                        |
| <b>MC<sup>CaR1B12A</sup> probe</b>   | GAAAGAAATAAAAAAGAGTTA                  | TAACCTTTTTATTTCCTTC                       |
| <b>WT<sup>CaR1A-6A</sup> probe</b>   | CTTTTTGGAACTCCAGT                      | ACTGGAGTTGTCCAAAAAG                       |
| <b>M<sup>CaR1A-6A</sup> probe</b>    | CTTTTTGGAAAACTCCAGT                    | ACTGGAGTTTTTCCAAAAAG                      |
| <b>WT<sup>CaR1B16A</sup> probe</b>   | TGAAAACAATAACAAGATCC                   | GGATCTTGTTATGTTTTCA                       |
| <b>M<sup>CaR1B16A</sup> probe</b>    | TGAAAAATAAAAAAGATCC                    | GGATCTTTTTATTTTTTCA                       |
| <b>WT<sup>CaR1B23HSE</sup> probe</b> | CAATCCGTTCTAGAAAGTGA                   | TCACTTCTAGAACGGATTG                       |
| <b>M<sup>CaR1B23HSE</sup> probe</b>  | CAATCCGAAAAAAAAAGTGA                   | TCACTTTTTTTTCGGATTG                       |
| <b>WT<sup>CaR1B11HSE</sup> probe</b> | CGTCATTTCTAGAAAGTAGAT                  | ATCTACTCTAGAAATGACG                       |
| <b>M<sup>CaR1B11HSE</sup> probe</b>  | CGTCATAAAAAAAAAAGTAGAT                 | ATCTACTTTTTTTATGACG                       |
| <b>WT<sup>CaR1AHSE</sup> probe</b>   | ATTACTTTCTAAGATTTATG                   | CATAAATCTTAGAAAGTAAT                      |
| <b>M<sup>CaR1AHSE</sup> probe</b>    | ATTACTAAAAAAAAATTTATG                  | CATAAATTTTTTTAGTAAT                       |
| <b>WT<sup>CaR1B12HSE</sup> probe</b> | CAAAGTTCTAGAAAGAAAT                    | ATTCTTCTAGAAACTTG                         |
| <b>M<sup>CaR1B12HSE</sup> probe</b>  | CAAAGTAAAAAAAAAGAAAT                   | ATTCTTTTTTTTACTTTG                        |
| <b>WT<sup>CaR1A-6HSE</sup> probe</b> | AATGTTTTTCTAGAATTAC                    | GTAATCTAGAAAAACATT                        |
| <b>M<sup>CaR1A-6HSE</sup> probe</b>  | AATGTTTAAAAAAAAATTAC                   | GTAATTTTTTTTAAAACATT                      |
| <b>WT<sup>CaR1B16HSE</sup> probe</b> | GACCTTCTAGAAAATCACT                    | AGTGATTTCTAGAAAGGTC                       |
| <b>M<sup>CaR1B16HSE</sup> probe</b>  | GACCTAAAAAAAAAATCACT                   | AGTGATTTTTTTTTAGGTC                       |
| <b>3x AACAA probe</b>                | AACAA AACAA AACAA                      | TTGTT TTGTT TTGTT                         |
| <b>3x AACAAm probe</b>               | AAAAA AAAAA AAAAA                      | TTTT TTTT TTTT                            |
| <b>3x HSE probe</b>                  | AATTCTAGAAAAATTCTAGAAAAATC<br>TAGAAAA  | TTTTCTAGAATT TTTTCTAGAATT<br>TTTTCTAGAATT |
| <b>3x HSEm probe</b>                 | AATCTTTCTAA AATCTTTCTAA<br>AATCTTTCTAA | TTAGAAAGAATT TTAGAAAGAATT<br>TTAGAAAGAATT |

|                                     |                     |                                                          |                                                        |
|-------------------------------------|---------------------|----------------------------------------------------------|--------------------------------------------------------|
| Primers used for NLRs VIGS analysis | <b>CaR1B23-VIGS</b> | GGGGACAAGTTTGTACAAAAAAGCAGGC<br>TTC TGTGGGAAGCTGATGTGTGG | GGGGACCACTTTGTACAAGAAAGCTGGGTC<br>TCTTCTCCATCTCGGCCAGA |
|                                     | <b>CaR1B11-VIGS</b> | GGGGACAAGTTTGTACAAAAAAGCAGGC<br>TTC ACCACTTCCCTCCAACGTTG | GGGGACCACTTTGTACAAGAAAGCTGGGTC<br>TCCTCGTCCGATCATTGG   |
|                                     | <b>CaR1A-VIGS</b>   | GGGGACAAGTTTGTACAAAAAAGCAGGC<br>TTC AGCTACGACATGTGGACACC | GGGGACCACTTTGTACAAGAAAGCTGGGTC<br>CAGGCTCGAAGGGAAGTGAA |
|                                     | <b>CaR1B12-VIGS</b> | GGGGACAAGTTTGTACAAAAAAGCAGGC<br>TTC GTCCTTTGGAGCTACGCAGT | GGGGACCACTTTGTACAAGAAAGCTGGGTC<br>CGGCACAAACTCCTCAGCTA |
|                                     | <b>CaR1A6-VIGS</b>  | GGGGACAAGTTTGTACAAAAAAGCAGGC<br>TTC GGCATGCAGCTGACCAAAAT | GGGGACCACTTTGTACAAGAAAGCTGGGTC<br>TCCAAGCCTCAGTACTCCA  |
|                                     | <b>CaR1B16-VIGS</b> | GGGGACAAGTTTGTACAAAAAAGCAGGC<br>TTC GGACGCATTCTCGCAAATC  | GGGGACCACTTTGTACAAGAAAGCTGGGTC<br>AACGTCCCATTTTCCCTGCT |
|                                     | <b>NbR1B23-VIGS</b> | GGGGACAAGTTTGTACAAAAAAGCAGGC<br>TTCCTGCCCCAGTACGTTGATT   | GGGGACCACTTTGTACAAGAAAGCTGGGTC<br>ACGGCAGGTGACAGCTAAAA |
|                                     | <b>NbR1B11-VIGS</b> | GGGGACAAGTTTGTACAAAAAAGCAGGC<br>TTC CAAGTCAGCAGAGGCCGTTA | GGGGACCACTTTGTACAAGAAAGCTGGGTC<br>CGCCCTGCTAGCAATCCATA |
|                                     | <b>NbR1B12-VIGS</b> | GGGGACAAGTTTGTACAAAAAAGCAGGC<br>TTCGAACTCCTACTCCCGCAAG   | GGGGACCACTTTGTACAAGAAAGCTGGGTC<br>TCAGCCATGCTATGACCACC |
|                                     | <b>NbR1A6-VIGS</b>  | GGGGACAAGTTTGTACAAAAAAGCAGGC<br>TTCGAAATATGGTTGCGCTGGC   | GGGGACCACTTTGTACAAGAAAGCTGGGTC<br>CACTAGTGACGGCTGCAGAA |
|                                     | <b>NbR1B16-VIGS</b> | GGGGACAAGTTTGTACAAAAAAGCAGGC<br>TTCGGACGCATTCTCGCAAATC   | GGGGACCACTTTGTACAAGAAAGCTGGGTC<br>CCTTGAGGGTCGGAAACTCC |
| Primers used for promoter analysis  | <b>pCaR1B23-LUC</b> | GTCGACGGTATCGATAAGCTTAGCTAAG<br>AATGCACGACTT             | CAGGAATTCGATATCAAGCTTACGGCTGTG<br>GATCTCCGAG           |
|                                     | <b>pCaR1B11-LUC</b> | GTCGACGGTATCGATAAGCTTATTCATAT<br>AAAGGACCTCAA            | CAGGAATTCGATATCAAGCTTCCATCAGAAT<br>TGTCATCACT          |
|                                     | <b>pCaR1A-LUC</b>   | GTCGACGGTATCGATAAGCTTAGTGGATG<br>AGTTTGGGGTGG            | CAGGAATTCGATATCAAGCTTAGAATCGGG<br>AGATCACTACC          |
|                                     | <b>pCaR1B12-LUC</b> | GTCGACGGTATCGATAAGCTTTGAGTTGG<br>ATATATAGTTTC            | CAGGAATTCGATATCAAGCTTACGTGACTTC<br>CGAGCAGTAG          |
|                                     | <b>pCaR1A6-LUC</b>  | GTCGACGGTATCGATAAGCTTTTCAAGTA<br>TGGTGCCCATG             | CAGGAATTCGATATCAAGCTTACCTCCTTC<br>CTGAGATAAC           |
|                                     | <b>pCaR1B16-LUC</b> | GTCGACGGTATCGATAAGCTTTCTCAATT<br>CTCACCACCACC            | CAGGAATTCGATATCAAGCTTGTTCACTGAA<br>TTTGACGTAT          |

|                    |                                                         |                                                        |
|--------------------|---------------------------------------------------------|--------------------------------------------------------|
| <b>pCaR1B23-GW</b> | GGGGACAAGTTTGTACAAAAAAGCAGGC<br>TTCAGCTAACGAATGCACGACTT | GGGGACCACTTTGTACAAGAAAGCTGGGTC<br>CACGGCTGTGGATCTCCGAG |
| <b>pCaR1B11-GW</b> | GGGGACAAGTTTGTACAAAAAAGCAGGC<br>TTCATTCATATAAAGGACCTCAA | GGGGACCACTTTGTACAAGAAAGCTGGGTC<br>CCATCAGAATTGTCATCACT |
| <b>pCaR1A-GW</b>   | GGGGACAAGTTTGTACAAAAAAGCAGGC<br>TTCAGTGGATGAGTTTGGGGTGG | GGGGACCACTTTGTACAAGAAAGCTGGGTC<br>AGAATCGGGAGATCACTACC |
| <b>pCaR1B12-GW</b> | GGGGACAAGTTTGTACAAAAAAGCAGGC<br>TTCTGAGTTGGATATATAGTTTC | GGGGACCACTTTGTACAAGAAAGCTGGGTC<br>ACGTGACTTCCGAGCAGTAG |
| <b>pCaR1A6-GW</b>  | GGGGACAAGTTTGTACAAAAAAGCAGGC<br>TTCCTCAAGTATGGTGCCCATG  | GGGGACCACTTTGTACAAGAAAGCTGGGTC<br>CACCTCCTCCTGAGATAAC  |
| <b>pCaR1B16-GW</b> | GGGGACAAGTTTGTACAAAAAAGCAGGC<br>TTCCTCAATTCTCACCACCACC  | GGGGACCACTTTGTACAAGAAAGCTGGGTC<br>GTTCACTGAATTTGACGTAT |

4

5 **Supplementary Data Table S2. Grading standards for evaluation of disease resistance of**

6 **pepper plants to *R. solanacearum* by root irrigation<sup>3</sup>**

---

| <b>Score</b> | <b>Condition</b>                                                                                                    |
|--------------|---------------------------------------------------------------------------------------------------------------------|
| 0            | Pepper plant is normal and asymptomatic.                                                                            |
| 1            | Plant has slight withering, the basal one or two leaves are withered, but the apical region of the plant is normal. |
| 2            | In addition to the top leaves, one or two leaves are withered, but the apical region of the plant is normal.        |
| 3            | Two-thirds of the leaves of the pepper plant are withered, while the top of the plant is normal.                    |
| 4            | The whole plant is withered or dead.                                                                                |

---

7



8 **Figures**

**a**

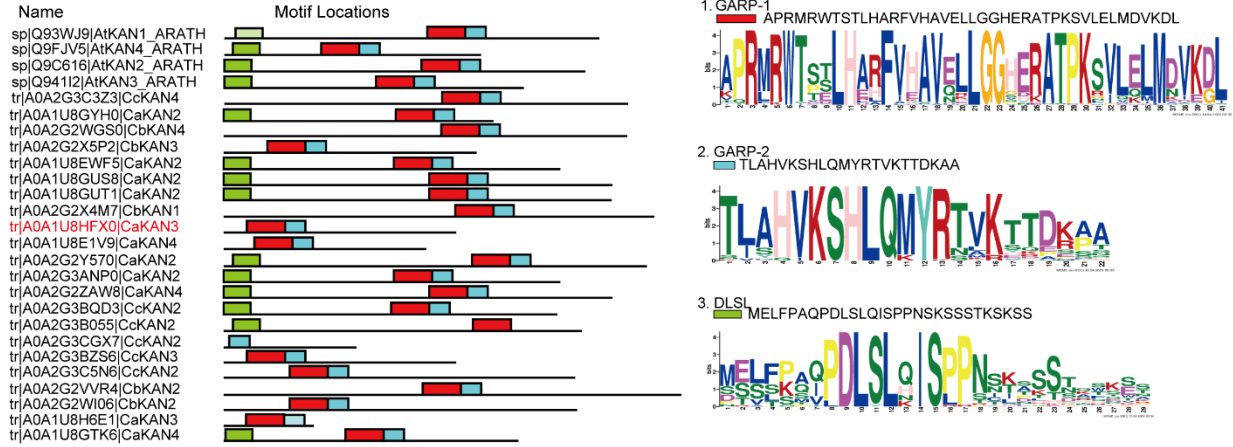

**b**

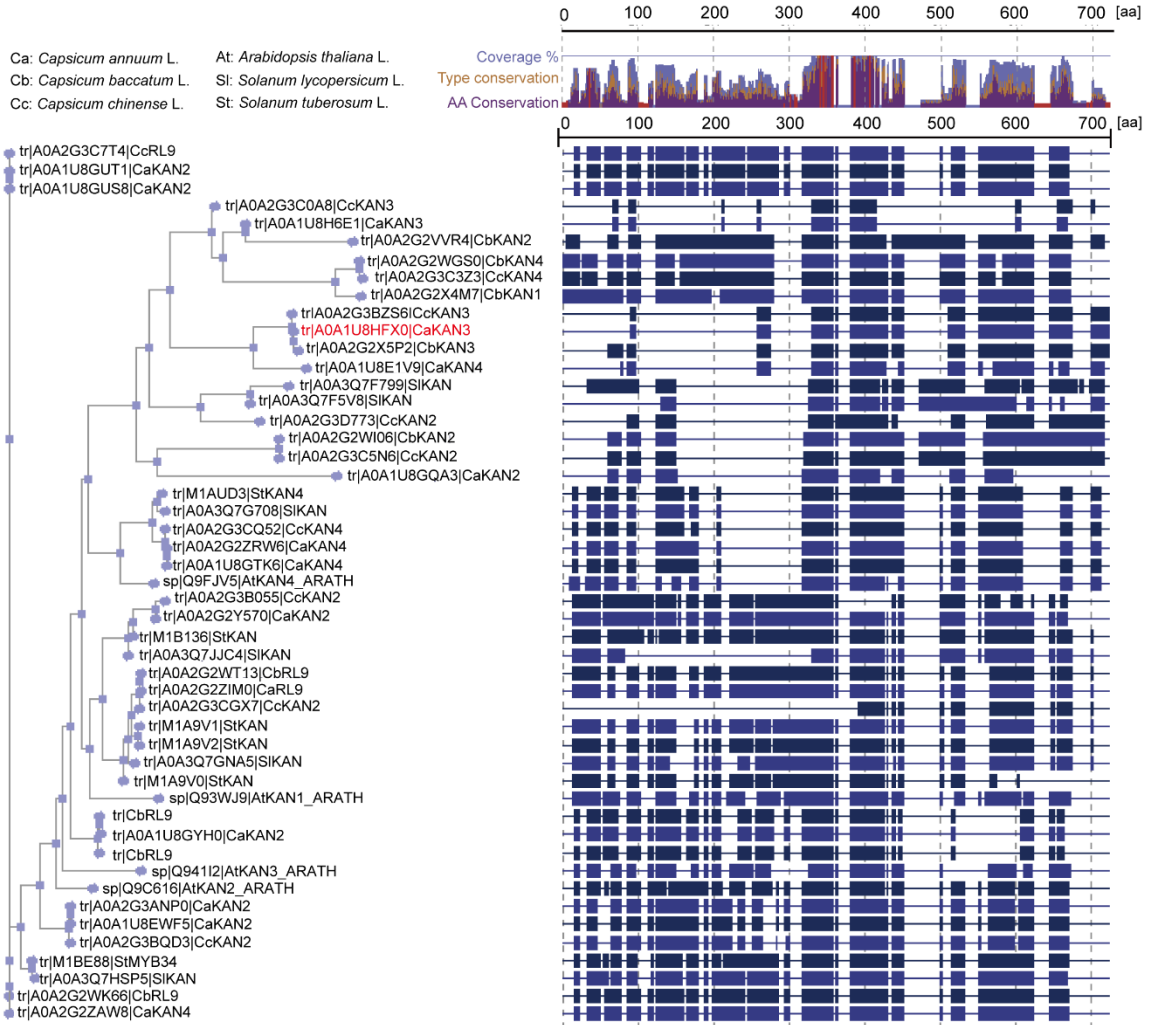

9

10 **Supplementary Data Fig.1|CaKAN3 sequence analysis and phylogenetic tree of CaKAN3**  
 11 **and the KANADI members in pepper, potato, tomato and Arabidopsis. a, The hidden**  
 12 **Markov model (HMM) profile of the GARP domain (Pfam: PF16731) (<http://pfam.xfam.org/>)**

13 was used as a BLAST query against the pepper genome database PGP  
14 (<http://peppergenome.snu.ac.kr/>) and the KANADI proteins in *Arabidopsis*, *Solanum*  
15 *lycopersicum* and *Solanum tuberosum* from UniProt (<https://www.uniprot.org/>). Motifs were  
16 identified by MEME tools in KANADIs. In total, 3 motifs were identified, and only the GARP  
17 domain was identified in CaKAN3. **b**, Phylogenetic tree of KANADI members in pepper, potato,  
18 tomato and *Arabidopsis*; the phylogenetic tree was constructed with the Tree Browser from  
19 Solgenomics ([https://solgenomics.net/tools/tree\\_browser](https://solgenomics.net/tools/tree_browser)).

20

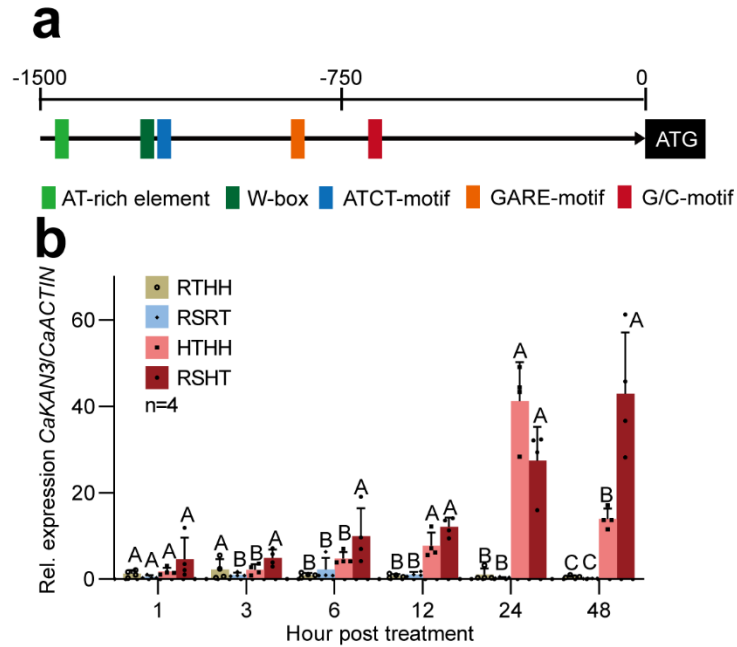

21

22 **Supplementary Data Fig.2| Response of  $CaKAN3$  to *Ralstonia solanacearum* infection under**

23 **room temperature (RSRT), high-temperature and high-humidity (HTHH) stress and**

24 ***Ralstonia solanacearum* infection under high temperature and high humidity (RSHT). a,**

25 **Cis-elements in the promoter region of  $CaKAN3$  by plant care**

26 **(<http://bioinformatics.psb.ugent.be/webtools/plantcare/html/>). b, Transcript levels of  $CaKAN3$  in**

27 **the roots of pepper plants challenged with RSRT, HTHH or RSHT, its transcript levels under**

28 **RTHH (room temperature and high humidity) at 1 hpt were set to 1, and the data are shown as**

29 **the means  $\pm$  standard errors of four replicates. Different uppercase letters above the bars indicate**

30 **significant differences between means ( $P < 0.01$ ) by Fisher's protected LSD test. Source data are**

31 **provided as a Source Data file.**

32

33

34

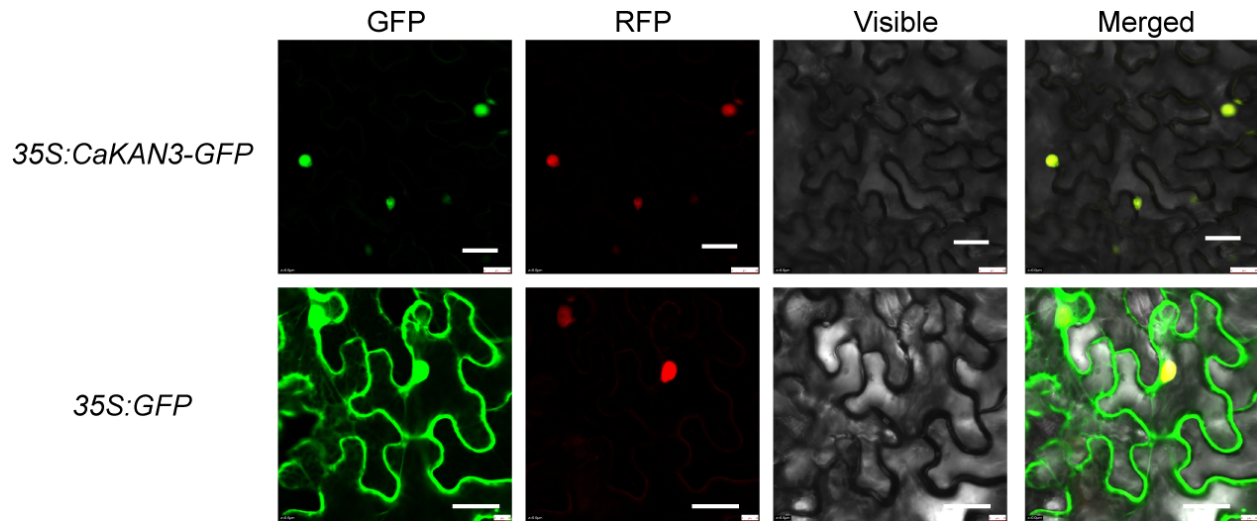

35

36 **Supplementary Data Fig.3|Nuclear Localization of CaKAN3 in *N. benthamiana* Epidermal**  
37 **Cells.** *N. benthamiana* leaves were infiltrated with Agrobacterium GV3101 cells containing  
38 *35Spro:CaKAN3-GFP* (using *35Spro:GFP* as a control). NbH2B (histone H2B)-RFP was used  
39 to indicate the nucleus. Subcellular localization of the CaKAN3-GFP fusion protein or control  
40 GFP was captured on a fluorescence confocal microscope at 24 hpi. Fluorescence images (left),  
41 bright-field images (middle), and the corresponding overlay images (right) of representative cells  
42 expressing GFP or CaKAN3-GFP fusion protein are shown, Bars = 50  $\mu$ m. The experiment was  
43 carried out thrice with similar results.

44

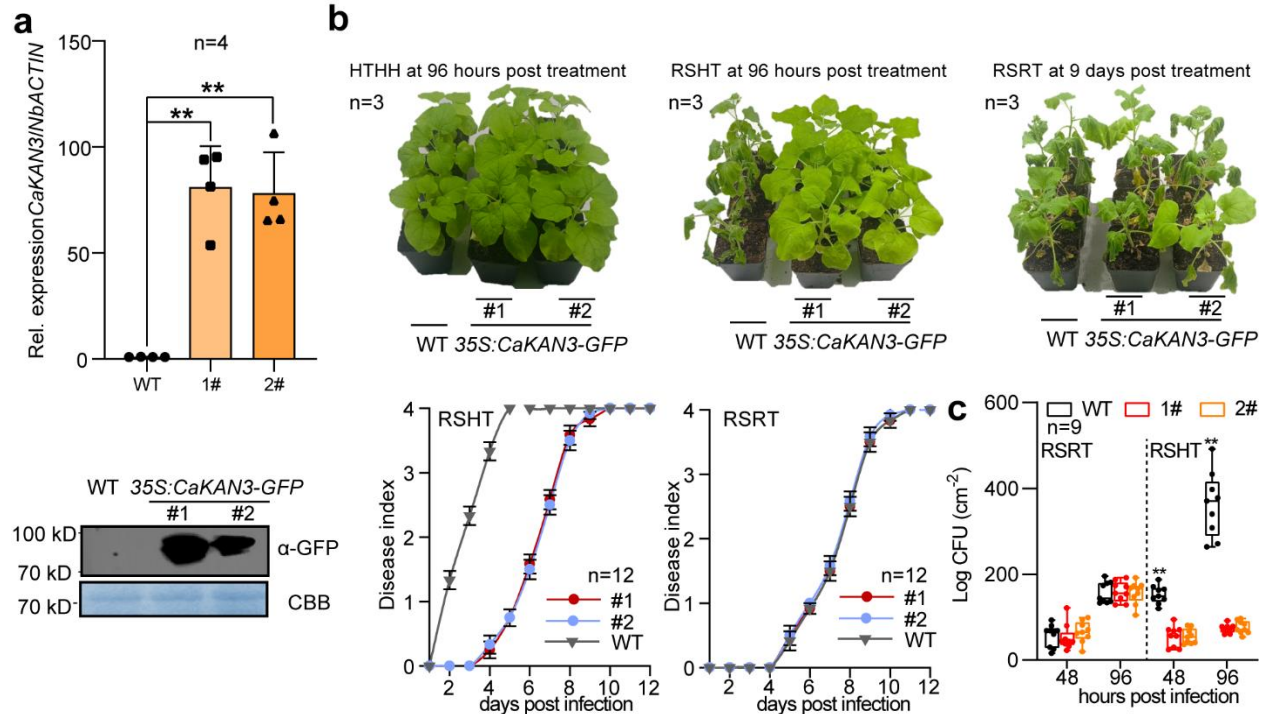

45

46 **Supplementary Data Fig. 4|The effect of CaKAN3 ectopic overexpression on the response of**  
 47 ***Nicotiana benthamiana* plants to *Ralstonia solanacearum* infection under room temperature**  
 48 **(RSRT), high temperature and high humidity (HTHH) or *Ralstonia solanacearum* infection**  
 49 **under high temperature and high humidity (RSHT). a, Confirmation of *CaKAN3***  
 50 **overexpression by RT-qPCR and immunoblot analysis with antibody of GFP in the two T<sub>2</sub>**  
 51 **transgenic *N. benthamiana* lines. α-GFP: anti body of GFP. b, The *CaKAN3*-overexpressing *N.***  
 52 ***benthamiana* plants displayed lower level of disease index and higher level of resistance to**  
 53 **RSHT but not to RSRT compared to the wild-type control plants. The experiment was carried**  
 54 **out twice with similar results. c, *R. solanacearum*-inoculated, *CaKAN3*-overexpressing *N.***  
 55 ***benthamiana* plants showed higher pathogen growth than the wild type (shown as colony-**  
 56 **forming units [cfu]) upon RSHT but not upon RSRT. Data are shown as the means ± standard**  
 57 **errors of four replicates. Asterisks above the bars indicate significant differences between means**  
 58 **( $P < 0.01$ ) by Fisher's protected t test. The center line represents the median value and the**  
 59 **boundaries indicate the 25th percentile (upper) and the 75th percentile (lower). Whiskers extend**  
 60 **to the largest and smallest value. In b, and c, the experiments were carried out three with similar**  
 61 **results. In a, to c, source data are provided as a Source Data file.**

62

|              |   |   |   |   |
|--------------|---|---|---|---|
| CaHSFA1-YFPN | - | + | - | + |
| CaHSF8-YFPN  | + | - | + | - |
| CaKAN3-YFPC  | + | + | - | - |
| CaKAN4-YFPC  | - | - | + | + |

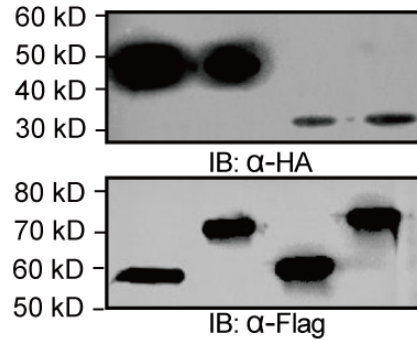

63

64 **Supplementary Data Fig.5|The success of transient overexpression of CaHSFA1,CaHSF8,**  
 65 **CaKAN3 and CaKAN4 in *N. benthamiana* plants.** The proteins were isolated from leaves of  
 66 *N. benthamiana* plants agroinfiltrated with GV3101 cells at 48 hpi. The experiment was carried  
 67 out once.

68

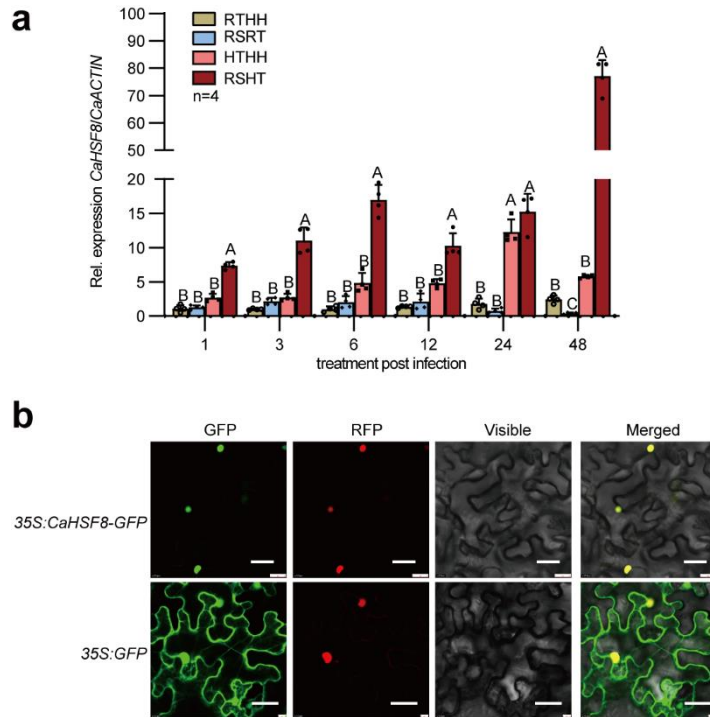

70

71 **Supplementary Data Fig.6|Transcript expression level analysis and subcellular localization**  
 72 **analysis of *CaHSF8*.** **a**, Transcript levels of *CaHSF8* in the roots of pepper plants challenged  
 73 with RSRT, HTHH or RSHT. The transcript levels of *CaHSF8* under RTHH at 1 hpt were set to  
 74 1, and the data are shown as the means  $\pm$  standard errors of four replicates. Different uppercase  
 75 letters above the bars indicate significant differences between means ( $P < 0.01$ ) by Fisher's  
 76 protected LSD test. Source data are provided as a Source Data file. **b**, Subcellular localization of  
 77 *CaHSF8*-GFP in epidermal cells of *N. benthamiana* leaves. NbH2B (histone H2B)-RFP was used  
 78 to indicate the nucleus. Red and green fluorescence, visible light and merged images were taken  
 79 on a confocal microscope. Bars = 50  $\mu$ m.



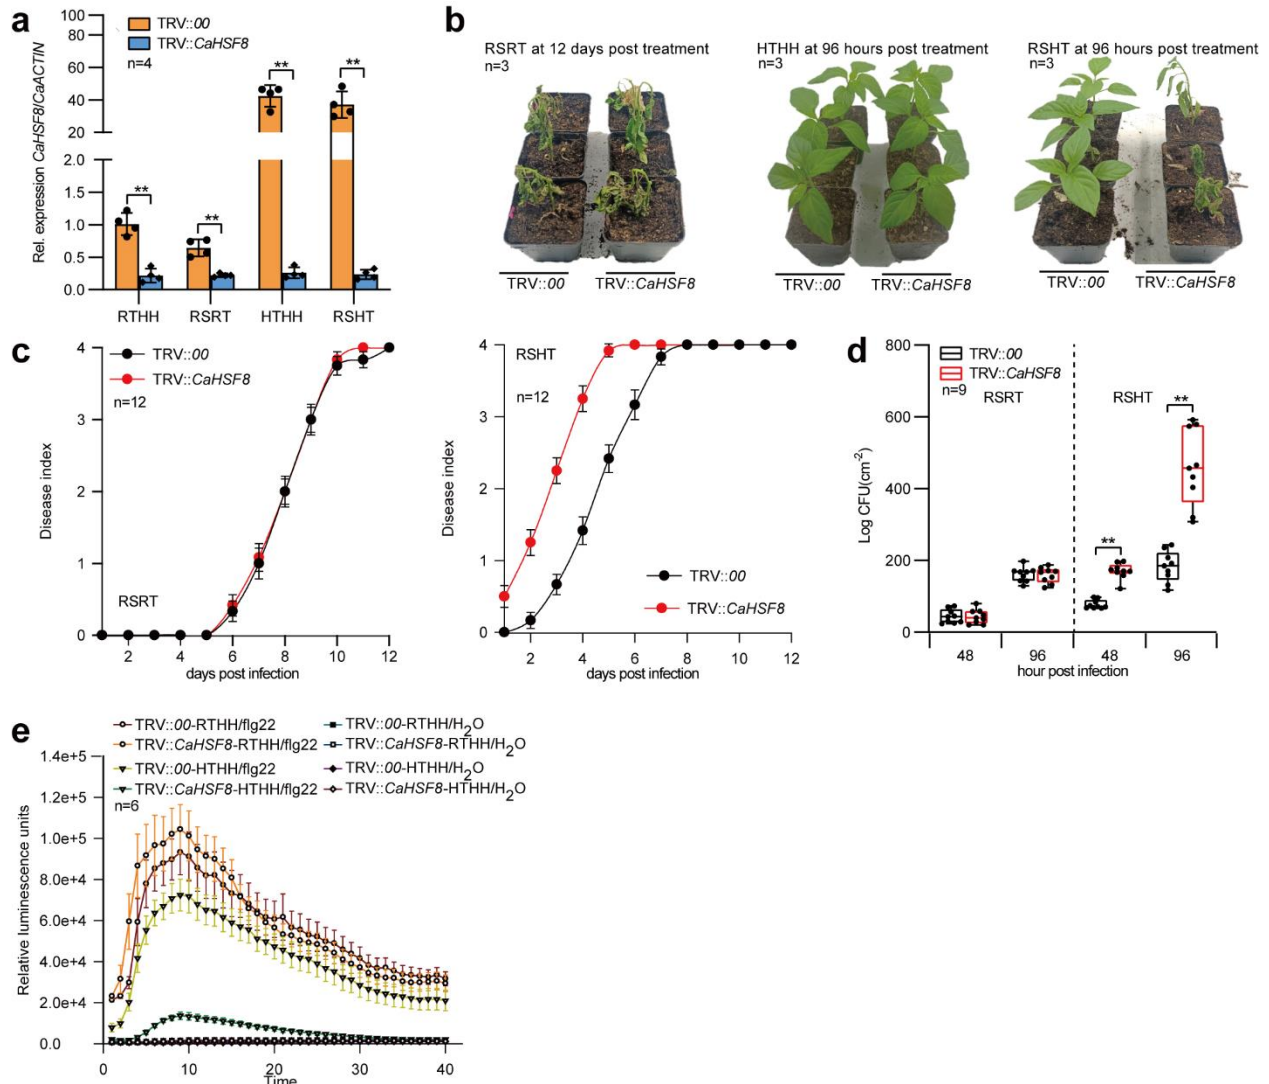

80

81 **Supplementary Data Fig.7|The silencing of CaHSF8 significantly reduced pepper immunity**  
 82 **against RSHT. a**, The success of *CaHSF8* silencing by virus-induced gene silencing (VIGS)  
 83 was determined by measuring the transcript levels of *CaHSF8* in RTHH-, RSRT-, HTHH- and  
 84 RSHT-challenged TRV:*CaHSF8* pepper plants at 24 hours post-treatment (hpt). The transcript  
 85 levels of *CaHSF8* in TRV:00 pepper plants under RTHH were set to 1. **b**, Effect of *CaHSF8*  
 86 silencing on the response of pepper plants to RSRT and RSHT treatment at 3 and 12 dpt,  
 87 respectively. **c**, and **d**, The growth of *R. solanacearum* in *R. solanacearum*-inoculated *CaHSF8*-  
 88 silencing plants under RSHH or upon HTHH, shown as colony-forming units (cfu). Data were  
 89 shown as the means  $\pm$  standard errors of eight replicates. Asterisks above the bars indicate  
 90 significant differences between means ( $P < 0.01$ ), as calculated with a t test. The center line  
 91 represents the median value and the boundaries indicate the 25th percentile (upper) and the 75th  
 92 percentile (lower). Whiskers extend to the largest and smallest value. **e**, Decreased *flg22*-induced  
 93  $H_2O_2$  production in *CaHSF8*-silencing pepper plants upon HTHH. The results shown were  
 94 representative of two independent experiments. Data were shown as the means  $\pm$  standard errors



95 of six replicates. In **b**, and **c**, the experiments were carried out three with similar results. In **a**, **c**,  
 96 **d**, and **e**, source data are provided as a Source Data file.

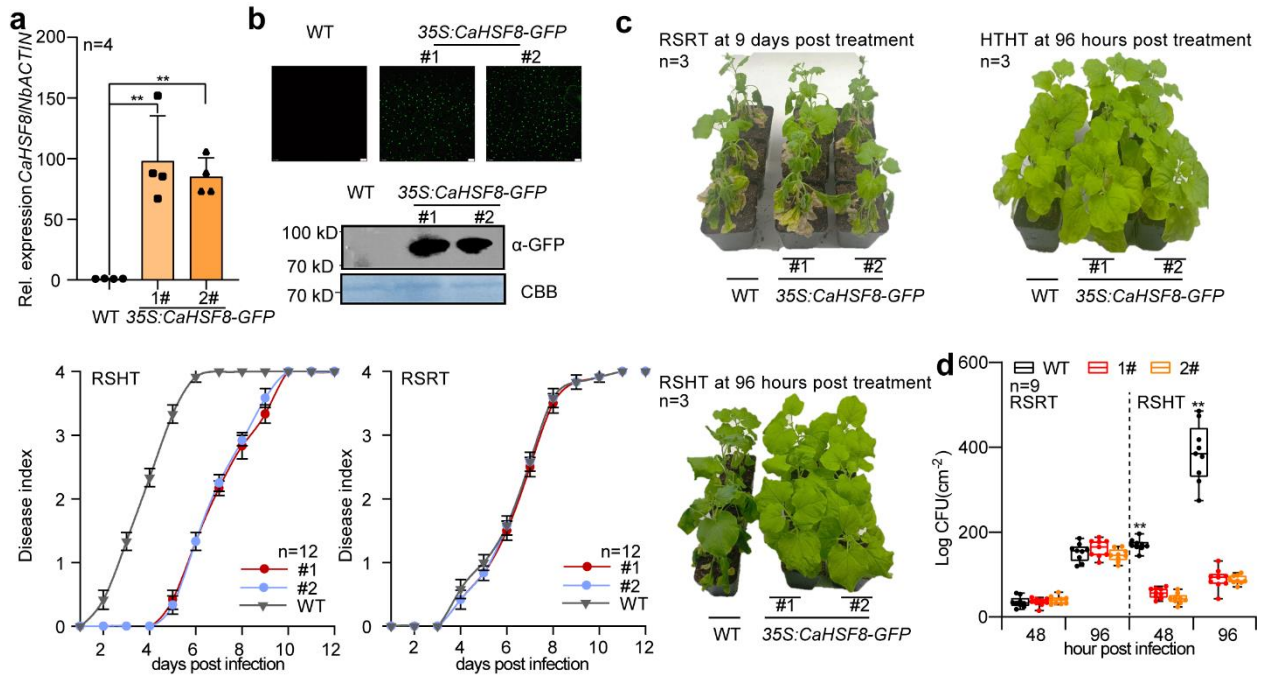

97

98 **Supplementary Data Fig.8|The overexpression of CaHSF8 significantly potentiated *N.***

99 ***benthamiana* immunity against RSHT.** **a**, and **b**, Confirmation of *CaHSF8* overexpression by  
 100 fluorescence detection, RT-qPCR and immunoblot analysis with antibody of GFP in the two T<sub>2</sub>  
 101 transgenic *N. benthamiana* lines. α-GFP: antibody of GFP. **c**, The *CaHSF8*-overexpressing *N.*  
 102 *benthamiana* plants displayed lower level of disease index and higher level of resistance upon  
 103 RSHT but not upon RSRT than the wild-type control plants. The experiment was carried out  
 104 twice with similar results. **d**, *R. solanacearum*-inoculated *CaHSF8*-overexpressing *N.*  
 105 *benthamiana* plants showed higher pathogen growth than the wild type (shown as colony-  
 106 forming units [cfu]) upon RSHT but not upon RSRT. Data were shown as the means ± standard  
 107 errors of four replicates. The center line represents the median value and the boundaries indicate  
 108 the 25th percentile (upper) and the 75th percentile (lower). Whiskers extend to the largest and  
 109 smallest value. In **a** and **d**, the asterisk above the bars indicates significant differences between  
 110 means ( $P < 0.01$ ) by Fisher's protected t test. In **a**, **c**, and **d**, source data are provided as a Source  
 111 Data file.

112

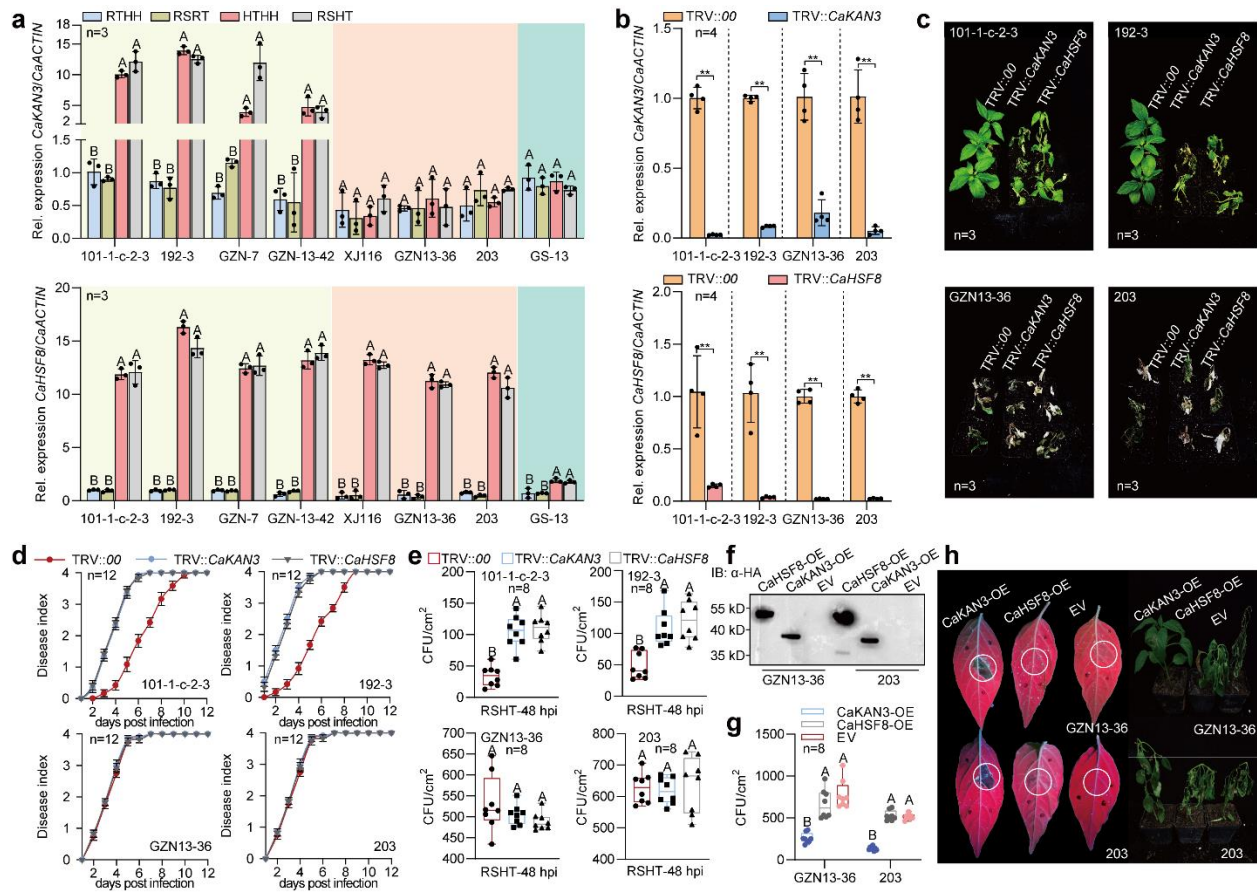

113

114 **Supplementary Data Fig.9|The expression of *CaHSF8* and *CaKAN3* and their functions in**  
 115 **immunity of pepper inbred lines against RSHT. a**, The relative transcript level of *CaKAN3*  
 116 and *CaHSF8* in pepper inbred lines with different level of resistance to RSHT in pepper plants  
 117 upon RTHH, RSRT, HTHH or RSHT. Data are shown as the means  $\pm$  standard errors of three  
 118 replicates. The transcript levels of 101-1-c-2-3/RTHH were set to 1. **b**, The silencing efficiency  
 119 of *CaKAN3* and *CaHSF8* in different pepper inbred lines by RT-qPCR. The transcript levels of  
 120 *CaKAN3* and *CaHSF8* in TRV::00 pepper plants under RTHH were set to 1. Data are shown as  
 121 the means  $\pm$  standard errors of four replicates. Asterisks above the bars indicate significant  
 122 differences between means ( $P < 0.01$ ) by Fisher's protected t test. **c**, The silencing of *CaKAN3* or  
 123 *CaHSF8* significantly reduced pepper immunity against RSHT in pepper lines with higher level  
 124 of RSHT resistance but not in lines with lower level of RSHT resistance. **d**, The silencing of  
 125 *CaKAN3* or *CaHSF8* significantly increased dynamic disease index from 0 to 12 dpt in pepper  
 126 lines with high level of RSHT resistance but not in lines with lower level of RSHT resistance.  
 127 Data were shown as the means  $\pm$  standard errors of twelve replicates. **e**, The silencing of  
 128 *CaHSF8* or *CaKAN3* supported an enhanced level of bacterial growth at 48 hpi by leaf inoculation  
 129 in pepper lines with high level of RSHT resistance but not in lines with lower level of RSHT  
 130 resistance. **f**, The success of transient overexpression of CaHSF8-HA or CaKAN3-HA by  
 131 immune blotting using antibody of HA in pepper line GZN13-36 and 203 that are susceptible to  
 132 RSHT. The experiment was carried out once. **g**, The transient overexpression of CaKAN3 but  
 133 not CaHSF8 significantly repressed the bacterial growth in the RSHT susceptible line GZN13-36

134 and 203. **h**, The transient overexpression of CaKAN3 significantly repressed the proliferation of  
135 RS by activating HR response in leaves of RSHT susceptible line GZN13-36 and 203 at 48 hpi,  
136 and conferred enhanced RSHT resistance at 6 dpi, but the transient overexpression of *CaHSF8*  
137 did not make any difference. In **a**, **e**, and **g**, Different uppercase letters above the bars indicate  
138 significant differences between means ( $P < 0.01$ ) by Fisher's protected LSD test. In **c**, **d**, and **h**,  
139 the experiments were carried out three with similar results. In **e** and **g**, the center line represents  
140 the median value and the boundaries indicate the 25th percentile (upper) and the 75th percentile  
141 (lower). Whiskers extend to the largest and smallest value. In **a**, **b**, **d**, **e**, and **g**, source data are  
142 provided as a Source Data file.

143

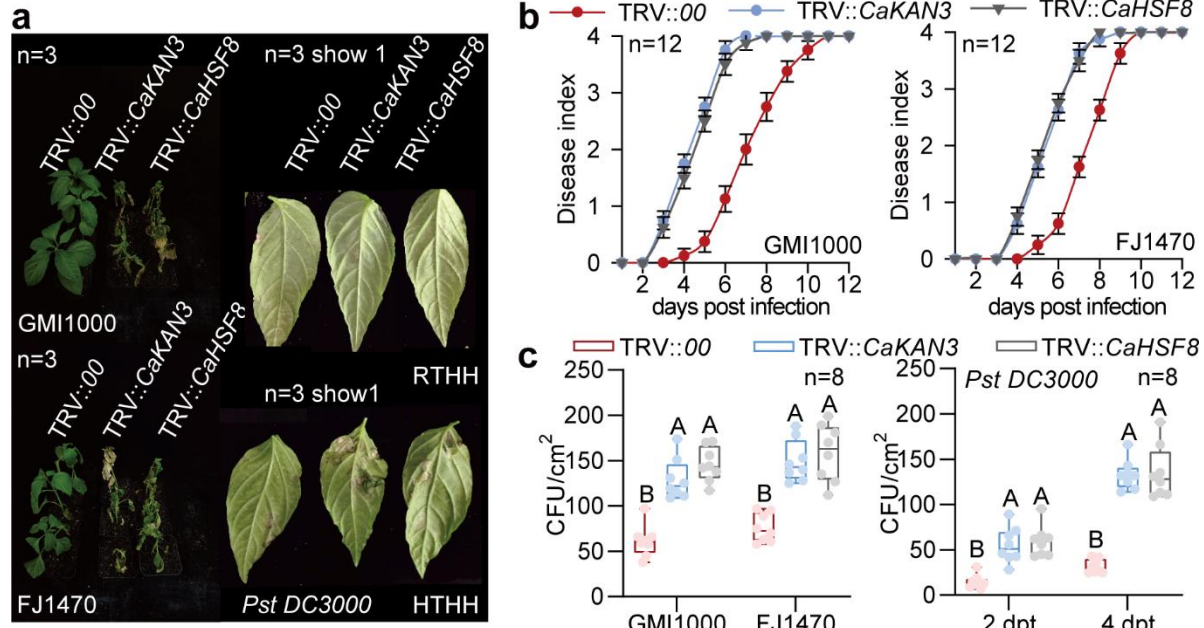

144  
 145 **Supplementary Data Fig.10|The effect of *CaKAN3* or *CaHSF8* silencing on the response of**  
 146 **pepper plants to inoculation of different *Ralstonia solanacearum* strains(FJ1470,GMI1000)**  
 147 **and to *Pst DC3000*.** **a**, The silencing of *CaKAN3* or *CaHSF8* significantly increased  
 148 susceptibility of pepper plants to inoculation of both FJ1470 and GMI1000 or *Pst DC3000* under  
 149 HTHH, but did not affect the response of pepper plant to the inoculation of *Pst DC3000* under  
 150 RTHH. **b**, The silencing of *CaKAN3* and *CaHSF8* significantly increased the dynamic disease  
 151 index of RSHT challenged pepper plants from 0 to 12 dpt. Data were shown as the means  $\pm$   
 152 standard errors of twelve replicates. **c**, The silencing of *CaKAN3* or *CaHSF8* promoted the  
 153 *Ralstonia solanacearum* or *Pst DC3000* growth displayed by cfu(clone forming units) in the  
 154 leaves of pepper plants inoculated using GMI1000,FJ1470 at 48 hpt or *Pst DC3000* at 2 and  
 155 4dpt.Different uppercase letters above the bars indicate significant differences between means  
 156 ( $P < 0.01$ ) by Fisher's protected LSD test. The center line represents the median value and the  
 157 boundaries indicate the 25th percentile (upper) and the 75th percentile (lower). Whiskers extend  
 158 to the largest and smallest value. In **a**, and **b**, the experiments were carried out three with similar  
 159 results. In **b**, and **c**, source data are provided as a Source Data file.



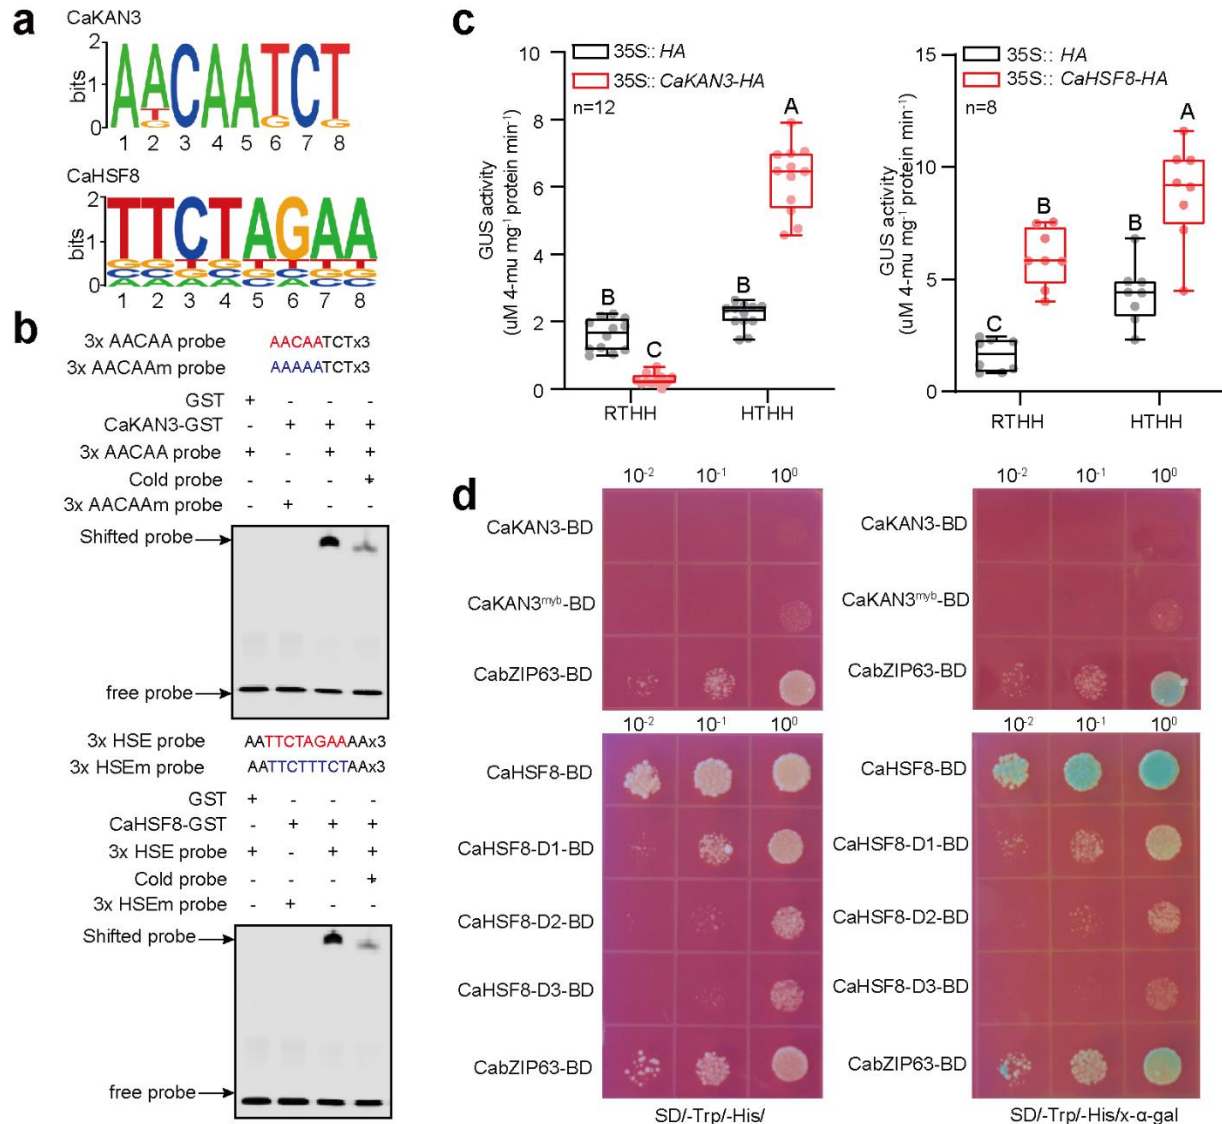

161

162 **Supplementary Data Fig. 11| The possible CaKAN3- or CaHSF8-bound cis-elements were**  
 163 **determined by ChIP-seq and the transcriptional activity of CaKAN3 or CaHSF8.** **a**, The  
 164 peak measured by ChIP-seq and its matched cis-element by HOMER motif search. **b**, The  
 165 binding of CaKAN3-GST or CaHSF8-GST to the 3×ACAA or 3×HSE cis-element fragment  
 166 by electrophoretic mobility shift assay in vitro. The experiment was carried out once. **c**, Activity  
 167 of GUS driven by synthetic promoters containing ACAA or HSE in leaves of transient  
 168 overexpression of CaKAN3 or CaHSF8 or control pepper plants at 48 hpt. Data represent the  
 169 mean ± SD of twelve biological replicates. Different uppercase letters above the bars indicate  
 170 significant differences between means ( $P < 0.01$ ) by Fisher's protected LSD test. Source data are  
 171 provided as a Source Data file. The center line represents the median value and the boundaries  
 172 indicate the 25th percentile (upper) and the 75th percentile (lower). Whiskers extend to the  
 173 largest and smallest value. **d**, Transcriptional activity of *CaKAN3* or *CaHSF8* by nutrition  
 174 disfigurement assay in GAL4-based yeast one-hybrid system. In **c**, and **d**, the experiments were  
 175 carried out twice with similar results.

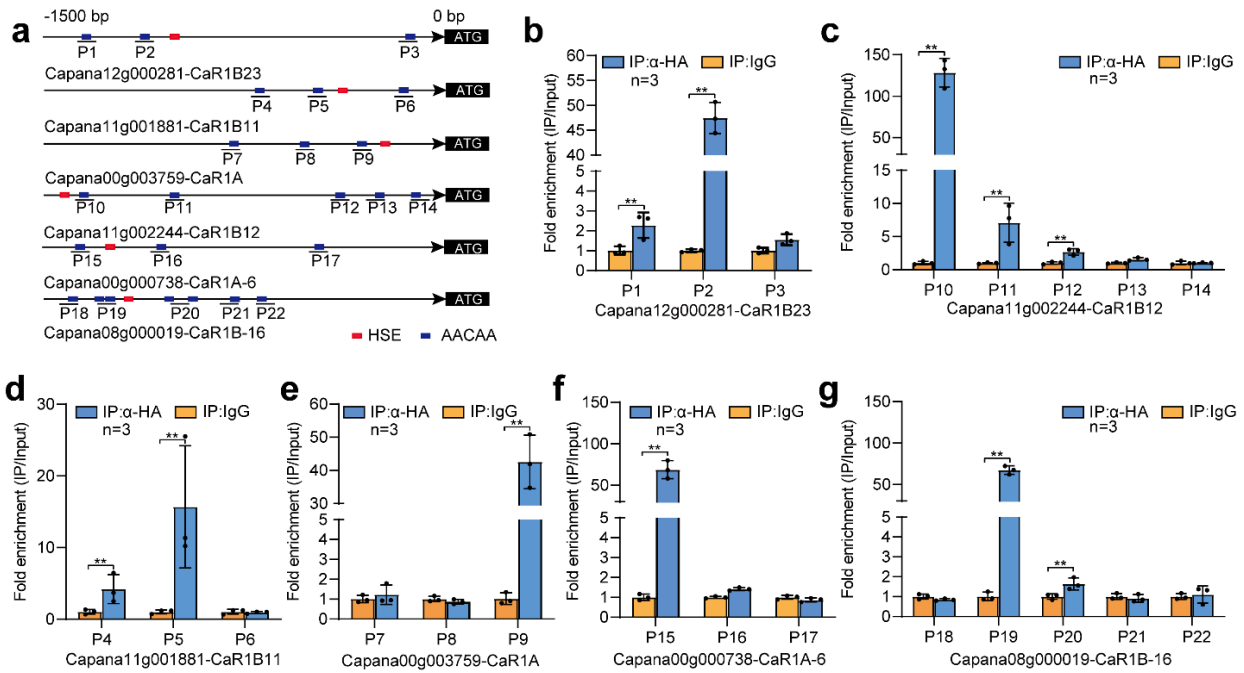

177

178 **Supplementary Data Fig.12|Bindings of CaKAN3 to the promoters of *CaR1B23*, *CaR1B12*,**  
 179 ***CaR1A*, *CaR1B11*, *CaR1A6* and *CaR1B16* by ChIP-qPCR. a**, Schematic diagram of the cis-  
 180 element HSE (red squares) and AACAA (blue squares) in the promoters of *CaR1B23*, *CaR1B12*,  
 181 *CaR1A*, *CaR1B11*, *CaR1A6* and *CaR1B16*. P1-P22 were fragments for designing the primer  
 182 pairs used to amplify the target DNA fragments in the promoters. **b**, to **g**, The bindings of  
 183 CaKAN3 to the different cis-elements by ChIP-qPCR, GV3101 cells containing *35S::CaKAN3-*  
 184 *HA* were infiltrated into pepper leaves, which were harvested at 48 hpi for ChIP-qPCR analysis  
 185 using specific primer pairs; IP: IgG was used as the control. The enrichment levels of the tested  
 186 genes were compared with those in the control, and the relative enrichment of IgG was set to a  
 187 value of 1 after normalization by input. Data represent the mean  $\pm$ SD of three biological  
 188 replicates. Different capital letters above the bars indicate significant differences ( $P < 0.01$ ) by  
 189 Fisher's protected t test. In **b**, to **g**, source data are provided as a Source Data file.

190

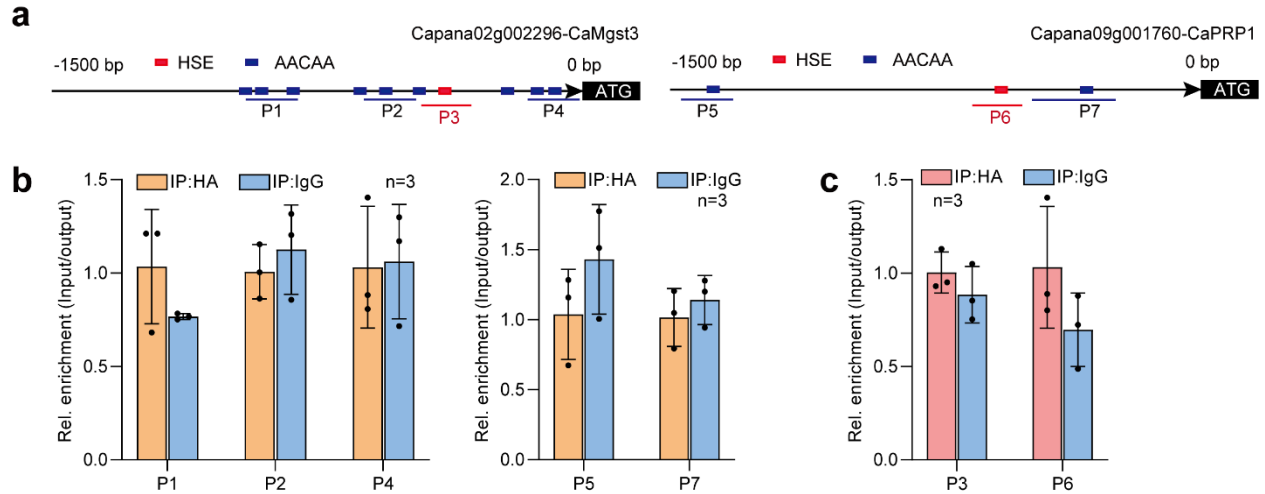

191

192 **Supplementary Data Fig.13|Neither CaKAN3 nor CaHSF8 bound the promoters of**  
 193 ***CaMgst3* and *CaPRP1*.** **a**, The distribution of the fragments in the promoter of *CaMgst3* or  
 194 *CaPRP1* corresponding to primers used in ChIP-qPCR to assay the enrichment of *CaKAN3* or  
 195 *CaHSF8* in the promoters of *CaMgst3* and *CaPRP1*. **b**, The enrichment of *CaKAN3* in the  
 196 promoter of *CaMgst3* or *CaPRP1* by ChIP-qPCR. **c**, The enrichment of *CaHSF8* in the promoter  
 197 of *CaMgst3* and *CaPRP1* by ChIP-qPCR. **b**, and **c**, GV3101 cells containing *35S:CaKAN3-HA*  
 198 or *35S:CaHSF8-HA* were infiltrated into pepper leaves, which were harvested at 48 hpi for  
 199 ChIP-qPCR analysis using specific primer pairs; IP: IgG was used as the control. The enrichment  
 200 levels of the tested genes were compared with those in the control, and the relative enrichment of  
 201 anti-HA was set to a value of 1 after normalization by input. Data represent the mean  $\pm$ SD of  
 202 three biological replicates. In **b**, to **c**, source data are provided as a Source Data file.

203

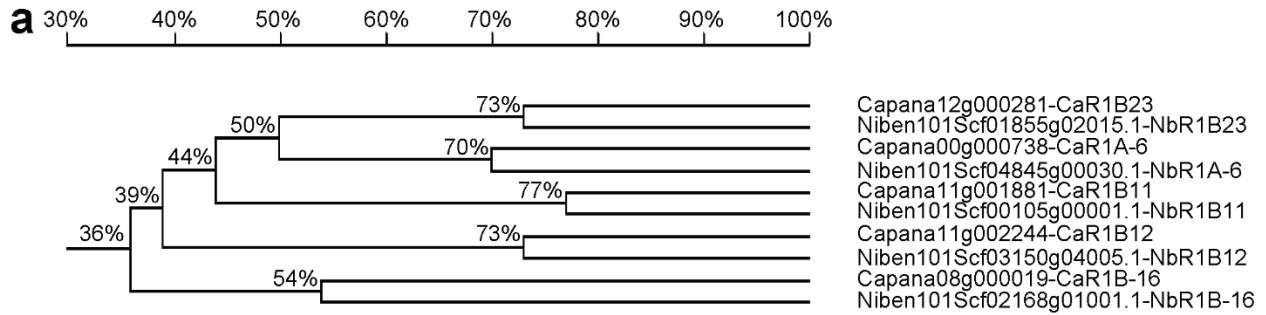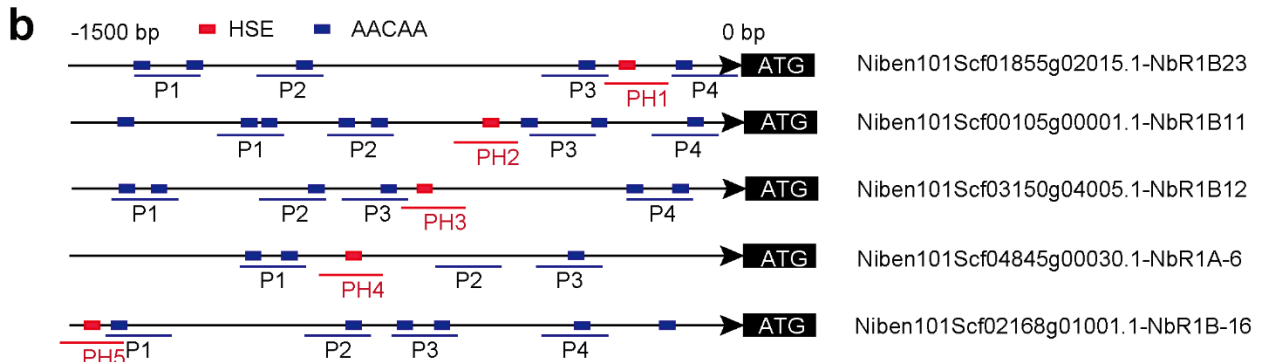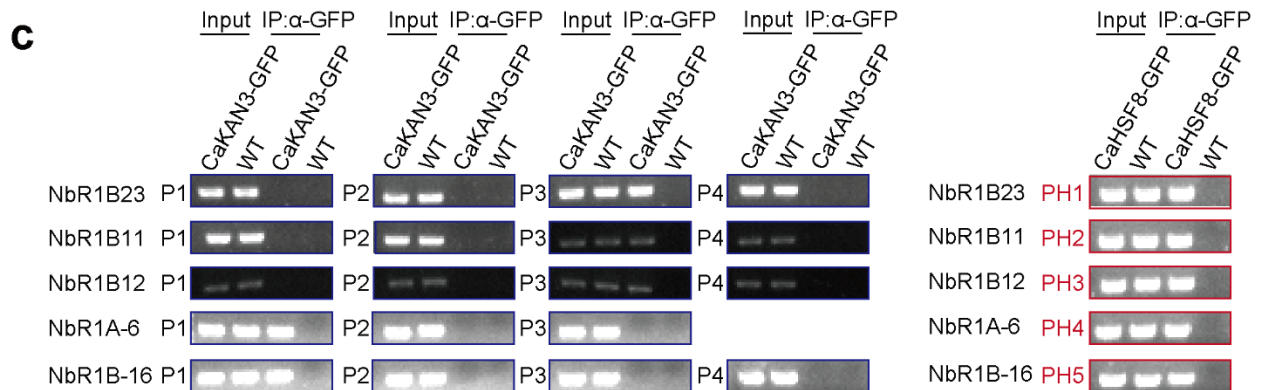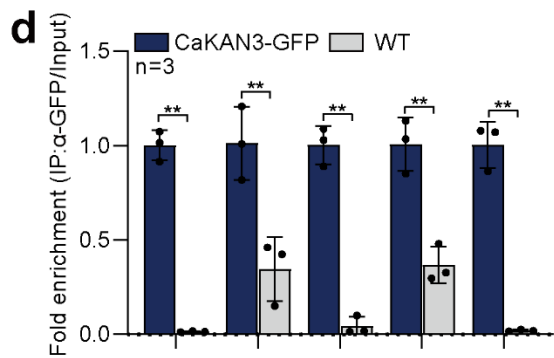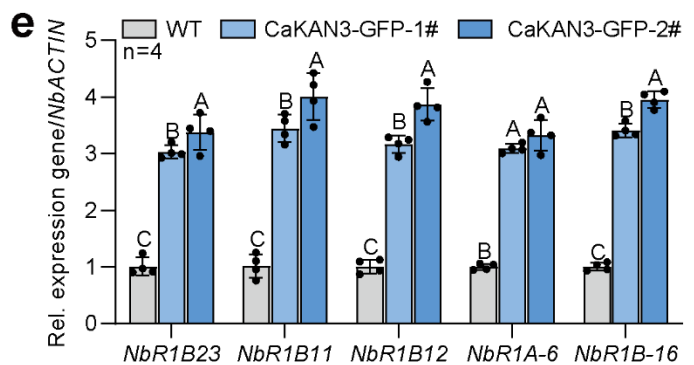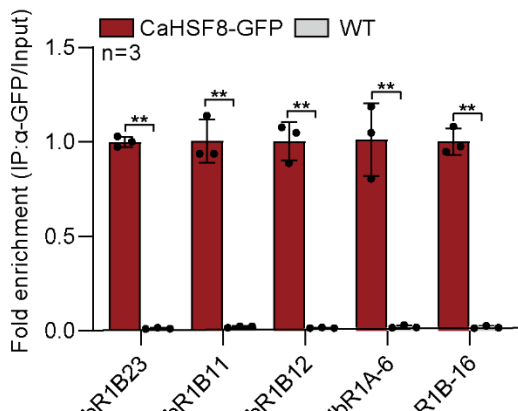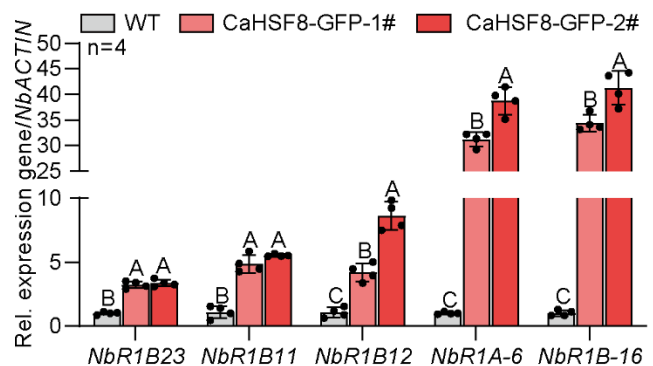



205 **Supplementary Data Fig.14|The targeting of NLR genes in *N. benthamiana* by CaKAN3 or**  
206 **CaHSF8. a,** Phylogenetic analysis of the five tested NLRs with its orthologs in *N. benthamiana*.  
207 **b,** The distribution of CaKAN3 and CaHSF8 responsive cis-elements and the fragments  
208 corresponding to primers used in ChIP-qPCR or ChIP-PCR assay in the promoters of NLR genes  
209 in *N. benthamiana*. **c,** The result of ChIP-PCR showed that both CaKAN3 and CaHSF8 bound  
210 the promoters of all of the five tested NLR genes. The experiment was carried out once. **d,** The  
211 data from ChIP-qPCR showed that both CaKAN3 and CaHSF8 bound the promoters of all of the  
212 five tested NLR genes. The enrichment levels of the tested genes were compared with those in  
213 the control, and the relative enrichment of IP: Anti-GFP/CaKAN3-GFP or IP: Anti-  
214 GFP/CaHSF8-GFP was set to a value of 1 after normalization by input. Data represent the mean  
215  $\pm$ SD of three biological replicates. Asterisks above the bars indicate significant differences  
216 between means ( $P < 0.01$ ) by Fisher's protected t test. **e,** The data from RT-qPCR showed that the  
217 overexpression of both CaKAN3 and CaHSF8 significantly upregulated the five tested NLR  
218 genes in *N. benthamiana* plants challenged with HTHH at 1 hpt. Data represent the mean  $\pm$ SD  
219 of four biological replicates. The transcript levels of WT were set to 1, *NbActin* was used as an  
220 internal control, and different capital letters above the bars indicate significant differences ( $P <$   
221 0.01) by Fisher's protected LSD test. In **d,** to **e,** source data are provided as a Source Data file.

222

223  
224

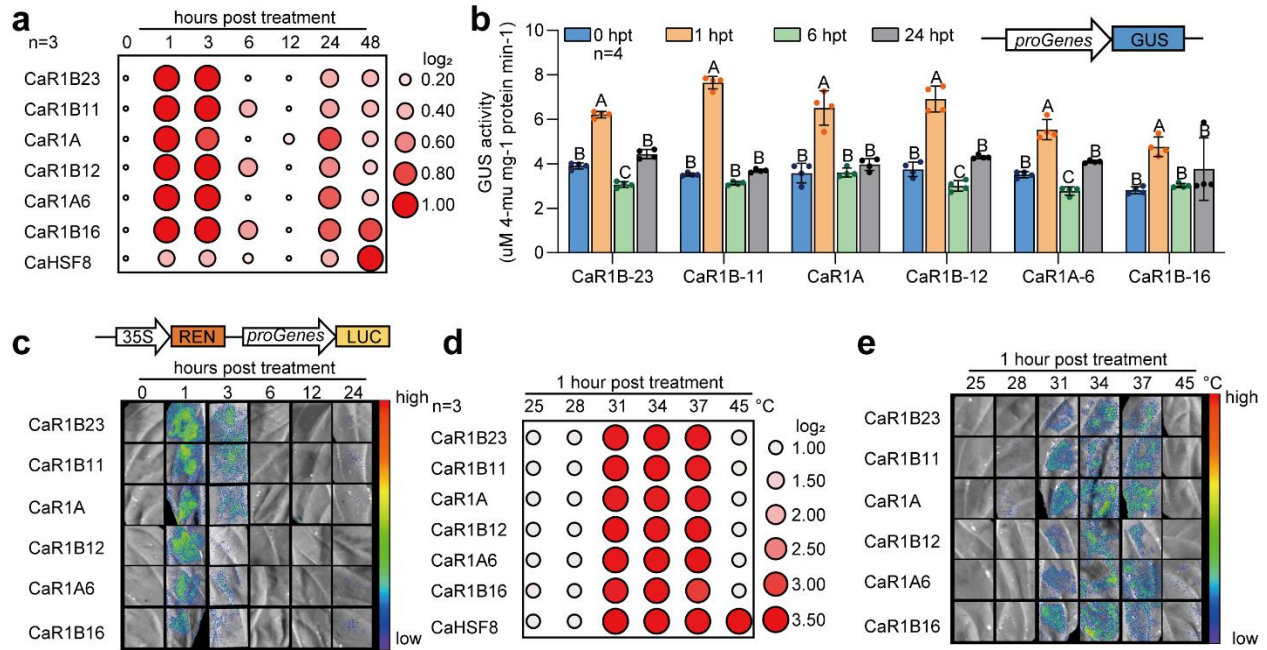

225

226 **Supplementary Data Fig.15|The transcript levels of *CaR1B23*, *CaR1B12*, *CaR1A*, *CaR1B11*,**  
 227 ***CaR1A6* and *CaR1B16* at different time points after high temperature treatment and**  
 228 **treatment with different temperatures. **a**,*CaR1B23*, *CaR1B12*, *CaR1A*, *CaR1B11*, *CaR1A6*,**  
 229 ***CaR1B16* and *CaHSF8* were upregulated at 1 hpt of high temperature treatment. **b**, The**  
 230 **transcript levels of *CaR1B23*, *CaR1B12*, *CaR1A*, *CaR1B11*, *CaR1A6* and *CaR1B16* upon high**  
 231 **temperature (37 °C, 90% humidity) treatment at 0, 1, 6, and 24 hpt by GUS activity assay. Data**  
 232 **represent the mean ±SD of four biological replicates. Different capital letters above the bars**  
 233 **indicate significant differences ( $P < 0.01$ ) by Fisher’s protected LSD test. **c**, The transcript levels**  
 234 **of *CaR1B23*, *CaR1B12*, *CaR1A*, *CaR1B11*, *CaR1A6* and *CaR1B16* upon high temperature**  
 235 **treatment (37 °C, 90% humidity) at 0, 1, 3, 6, 12, and 24 hpt by a LUC assay. **d**,*CaR1B23*,**  
 236 ***CaR1B12*, *CaR1A*, *CaR1B11*, *CaR1A6*, *CaR1B16* and *CaHSF8* were upregulated by different**  
 237 **high temperatures (from 31 to 37 °C, 90% humidity) treatment at 1 hpt. In **a**, and **d**, means ( $n =$**   
 238 **4) of fold induction compared to 0 hpt treatment shown as log<sub>2</sub> were used to construct the**  
 239 **heatmap using TBtools. **e**, The transcript levels of *CaR1B23*, *CaR1B12*, *CaR1A*, *CaR1B11*,**  
 240 ***CaR1A6* and *CaR1B16* upon high temperature(25, 28, 31, 34, 37, 45 °C, 90% humidity) at 1 hpt**  
 241 **by LUC assay. In **a**, **b**, and **d**, source data are provided as a Source Data file.**

242

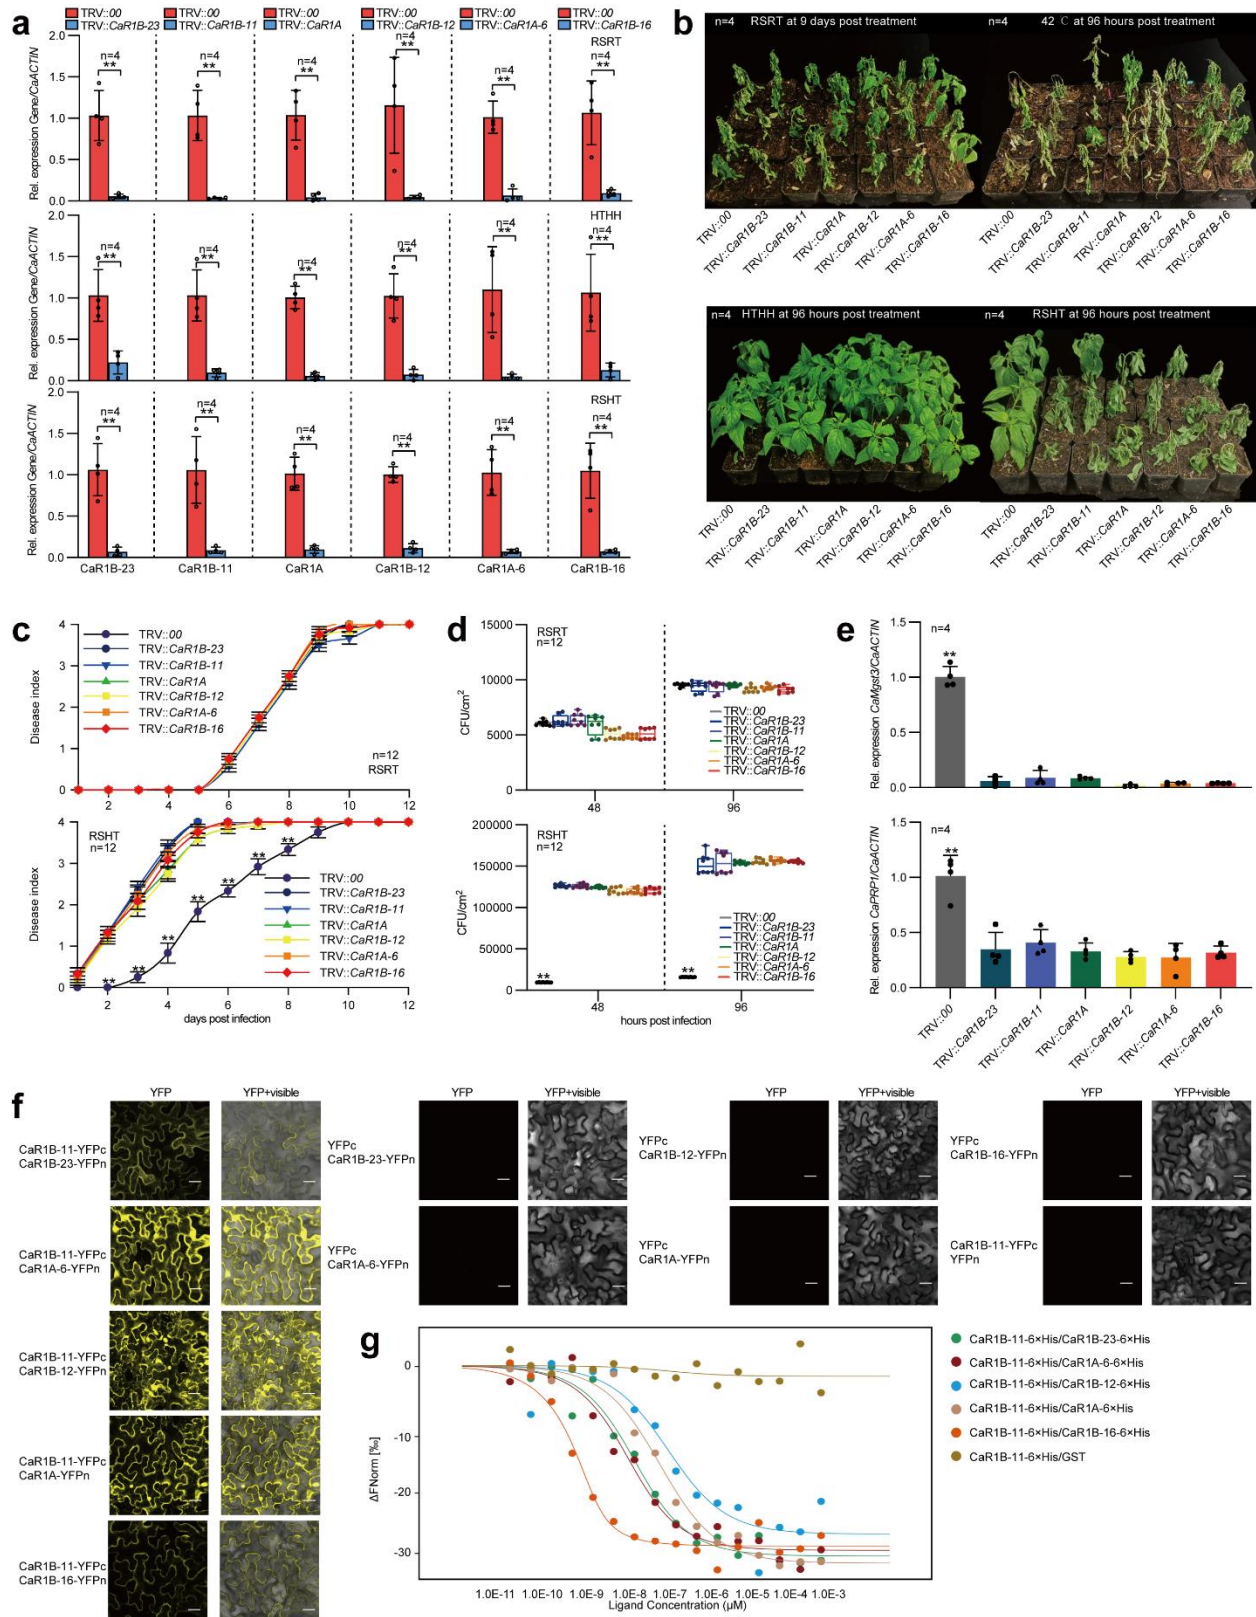

243

244 **Supplementary Data Fig.16|NLRs acted positively in pepper immunity against RSHT. a,**

245 The success of NLR silencing by virus-induced gene silencing (VIGS) by measuring the

246 transcript levels of NLRs in RSRT-, HTHH- or RSHT-challenged TRV:NLR pepper plants at 1  
247 hour post-treatment (hpt). **b**, Effect of NLR silencing on the response of pepper plants to RSRT  
248 and RSHT treatment at 3 and 9 dpt. **c**, The disease indices of *CaKAN3*-silenced pepper plants  
249 challenged with RSRT or RSHT from 0 to 12 dpt. The experiment was carried out twice with  
250 similar results. Data are shown as the means  $\pm$  standard errors of 24 replicates. Asterisks above  
251 the bars indicate significant differences between means ( $P < 0.01$ ), as calculated with a t test. **d**,  
252 The growth of *R. solanacearum* in *R. solanacearum*-inoculated NLR-silenced plants at room  
253 temperature or under HTHH, shown as colony-forming units (cfu). Data are shown as the means  
254  $\pm$  standard errors of eight replicates. Asterisks above the bars indicate significant differences  
255 between means ( $P < 0.01$ ), as calculated with a t test. The center line represents the median value  
256 and the boundaries indicate the 25th percentile (upper) and the 75th percentile (lower). Whiskers  
257 extend to the largest and smallest value. **e**, Relative transcript levels of *CaMgst3* and *CaPRP1* in  
258 TRV:00 and TRV:NLRs pepper plants challenged by RSHT. **f**, The result of BiFC showed that  
259 CaR1B-11 interacted with CaR1B23, CaR1A-6, CaR1B12, CaR1A, CaR1B16 in the epidermal  
260 cells of *N. benthamiana* leaves by agroinfiltration based transient overexpression at 48 hpi. The  
261 experiment was carried out once. **g**, CaR1B-11 interacted with CaR1B23, CaR1A-6, CaR1B12,  
262 CaR1A, CaR1B16 by MST, all of the proteins were expressed in and isolated from *E.coli* strain  
263 BL21 and the isolated CaR1B-11 was labeled with red fluorescence using a kit provided by  
264 manufactory (Monolith NT.115). In **a**, and **e**, The transcript levels of TRV:00 were set to 1,  
265 *CaActin* was used as an internal control, and asterisks above the bars indicate significant  
266 differences between means ( $P < 0.01$ ), as calculated with Fisher's protected t test. In **b**, and **c**, the  
267 experiments were carried out three with similar results. In **a**, **c**, **d**, and **e**, source data are provided  
268 as a Source Data file.

269

270

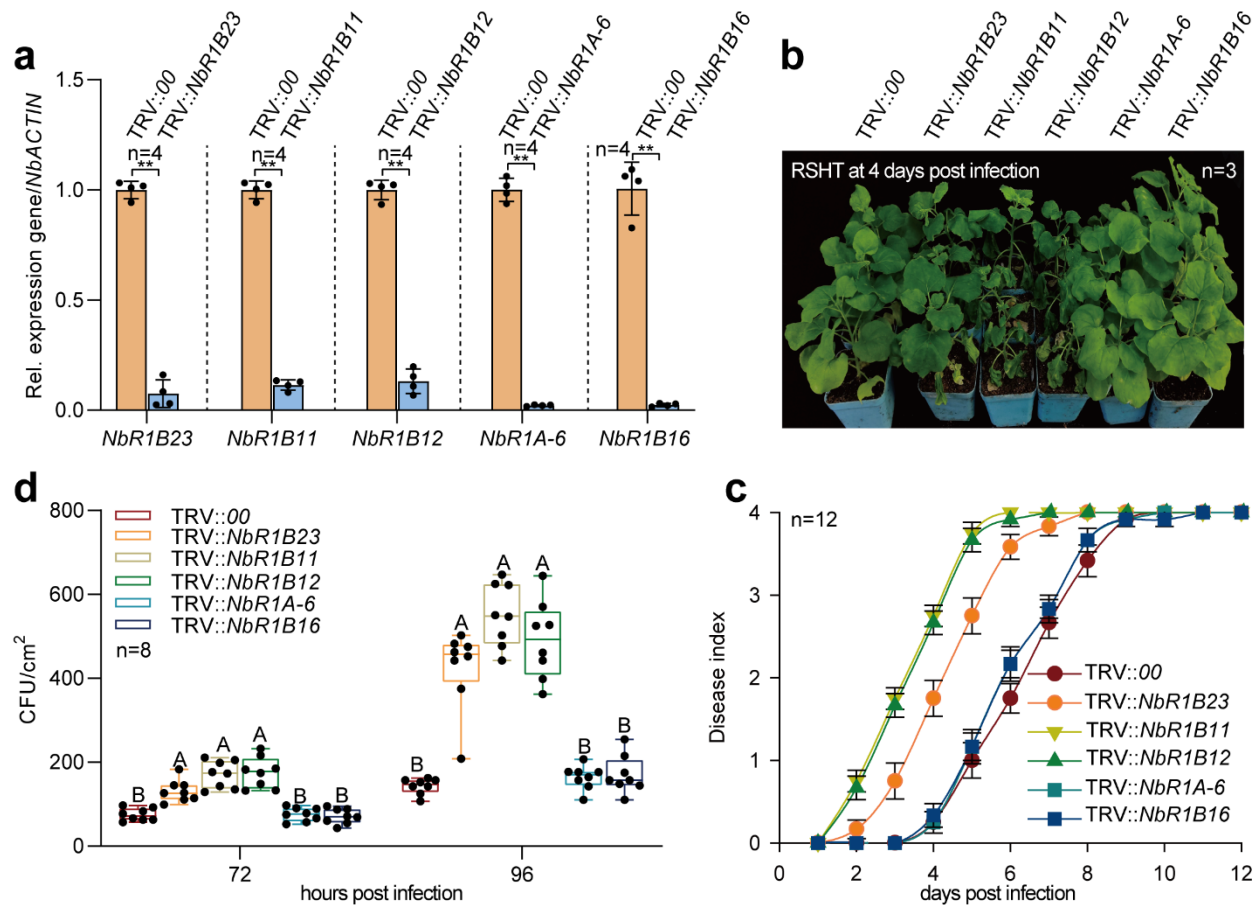

271

272 **Supplementary Data Fig.17|The effect of NLRs silencing on the response of *N. benthamiana***  
 273 **plant to RSHT. a**, The confirmation of NLR gene silencing by RT-qPCR, the result showed the  
 274 all of the NLR genes were successfully silenced by VIGS. Data represent the mean  $\pm$  SD of four  
 275 biological replicates. The transcript levels of TRV::00 plants were set to 1, *NbActin* was used as  
 276 an internal control, and asterisks above the bars indicated significant differences between means  
 277 ( $P < 0.01$ ) by Fisher's protected t test. **b**, The silencing of *NbR1B23*, *NbR1B11* or *NbR1B12*  
 278 significantly increased *N. benthamiana* susceptibility to RSHT, and the silencing of the other two  
 279 NLR genes did not produced any phenotypic effect. **c**, The silencing of *NbR1B23*, *NbR1B11* or  
 280 *NbR1B12* significantly increased the dynamic disease index of *N. benthamiana* plants challenged  
 281 with RSHT from 0 to 12 dpt, the silencing of other two NLR genes did not affect the dynamic  
 282 disease index. Data represent the mean  $\pm$  SD of twelve biological replicates. **d**, The silencing of  
 283 *NbR1B23*, *NbR1B11* or *NbR1B12* significantly promoted the bacterial growth in leaves of *N.*  
 284 *benthamiana* plants challenged with RSHT at 72 and 96 hpt. Different capital letters above the  
 285 bars indicate significant differences ( $P < 0.01$ ) by Fisher's protected LSD test. The center line  
 286 represents the median value and the boundaries indicate the 25th percentile (upper) and the 75th  
 287 percentile (lower). Whiskers extend to the largest and smallest value. In **b**, and **c**, the  
 288 experiments were carried out twice with similar results. In **a**, **c**, and **d**, source data are provided  
 289 as a Source Data file.

290



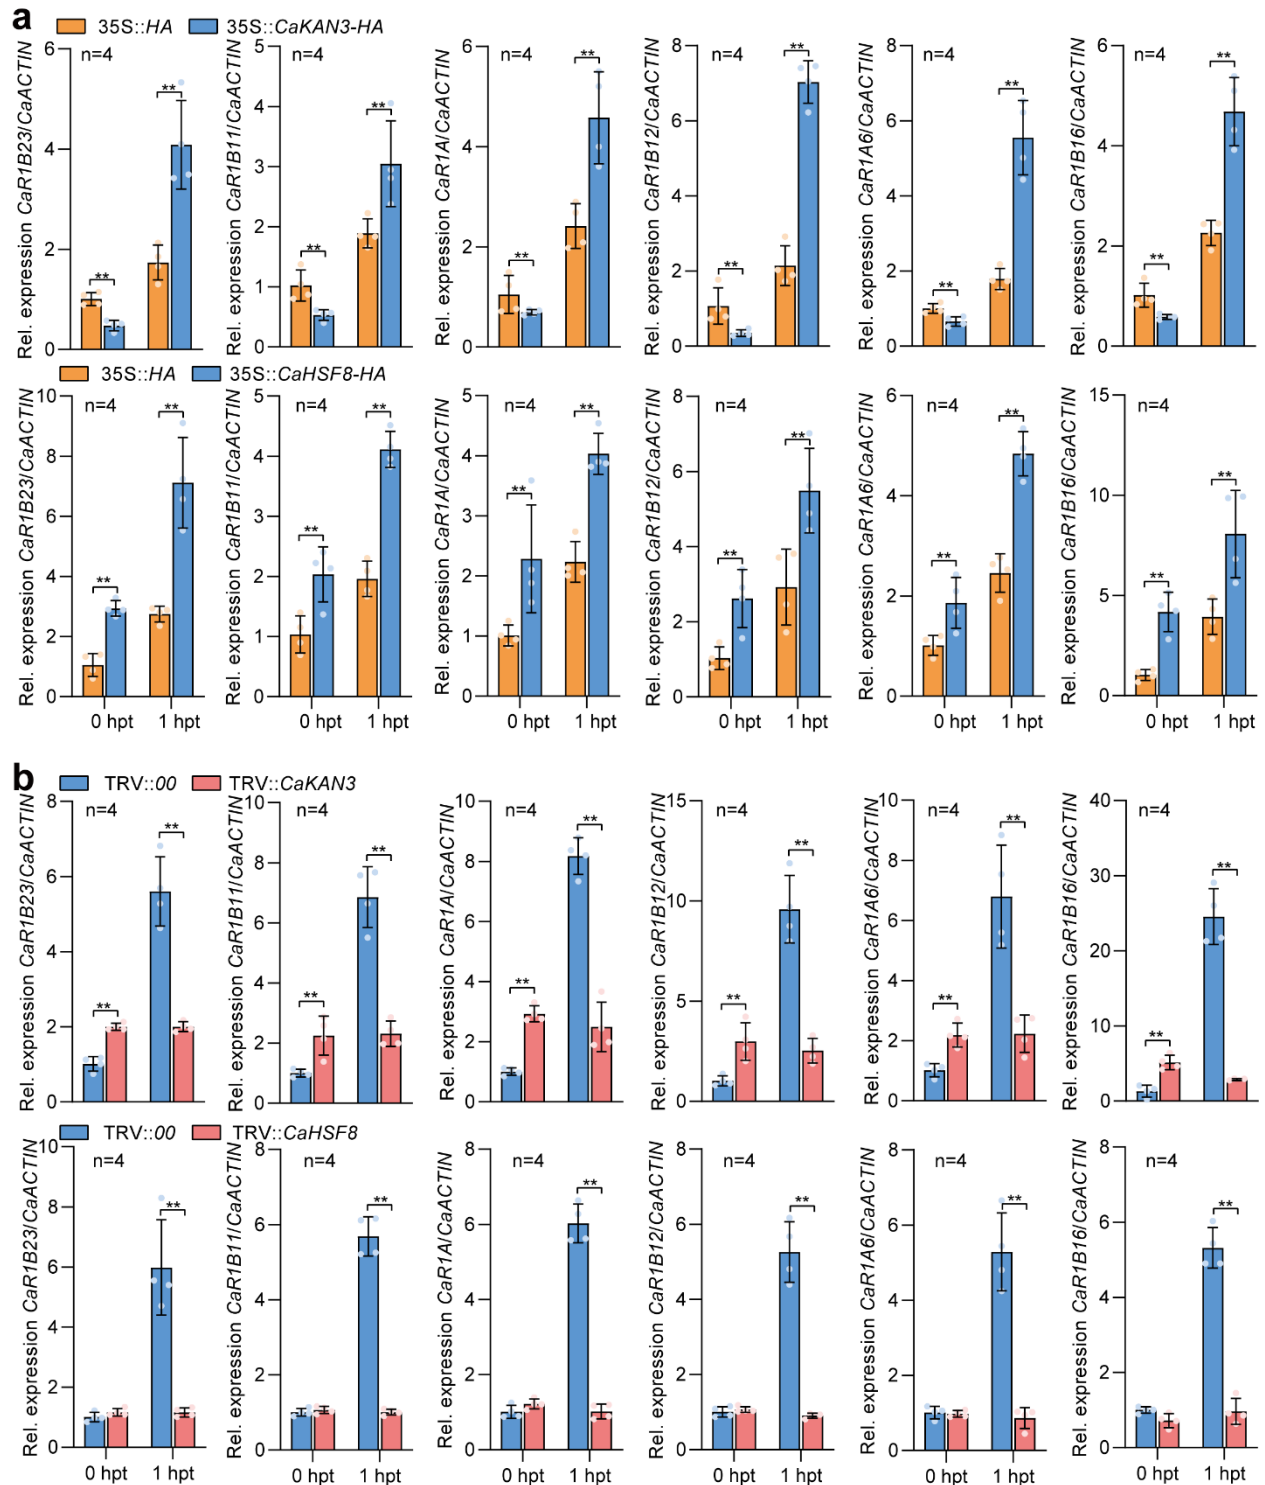

293 **Supplementary Data Fig.18|Regulation of the transcription of the six tested NLR genes by**  
 294 **CaKAN3 and CaHSF8. a,** The effect of CaKAN3 or CaHSF8 transient overexpression on the  
 295 transcript levels of the six tested NLR genes in pepper leaves treated with condition of 37 °C and  
 296 90% humidity at 0 and 1 hpt by RT-qPCR. **b,** Relative transcript levels of NLRs in TRV:00 and

297 TRV:*CaKAN3* or TRV:*CaHSF8* pepper plants challenged by condition of 37 °C and 90%  
298 humidity at 0 and 1 hpt. In **a** and **b**, the transcript levels of TRV:00/0 hpt were set to 1, and  
299 *CaActin* was used as an internal control. Data are shown as the means  $\pm$  standard errors of four  
300 replicates. Asterisks above the bars indicate significant differences between means ( $P < 0.01$ ), as  
301 calculated with a t test. In **a**, and **b**, source data are provided as a Source Data file.

302

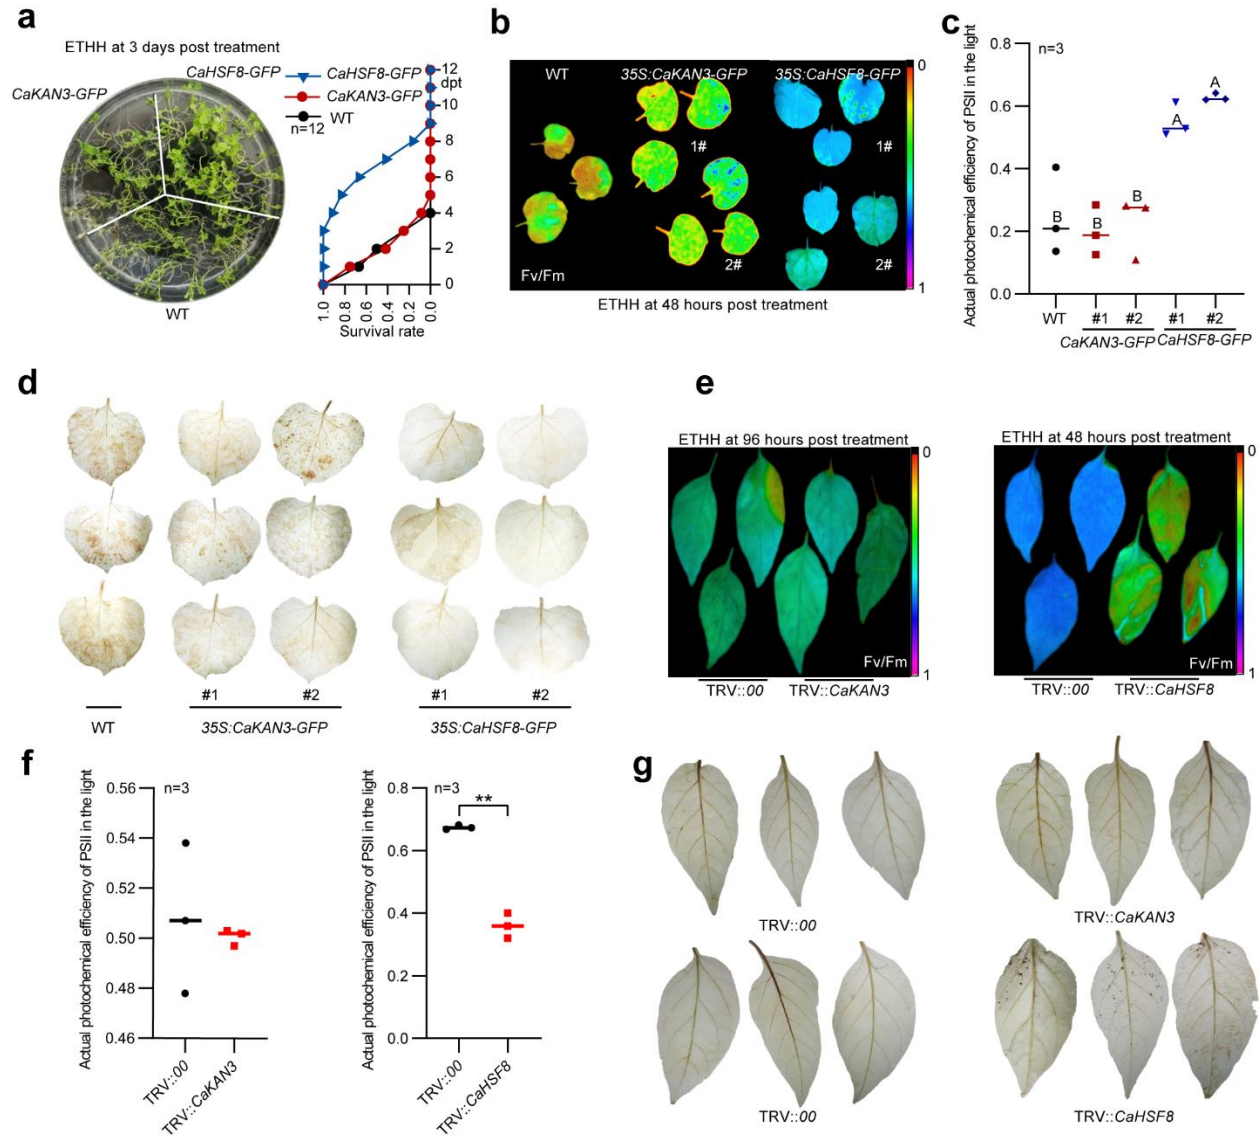

303

304 **Supplementary Data Fig.19|CaHSF8 acted positively in pepper thermotolerance. a,**  
 305 *CaHSF8* overexpressing *N. benthamiana* plants displayed enhanced thermotolerance compared  
 306 to the wild type control plants. The experiments were carried out twice with similar results. **b,**  
 307 and **c**, *CaHSF8* overexpressing *N. benthamiana* plants showed higher Fv/Fm or  $\Delta F/Fm$  upon  
 308 ETHH (42 °C, 90% humidity) treatment. **d**, *CaHSF8* overexpressing *N. benthamiana* plants  
 309 showed lower level H<sub>2</sub>O<sub>2</sub> accumulation displayed by DAB staining upon ETHH (42 °C, 90%  
 310 humidity) compared to the wild type control plants. **e**, and **f**, *CaHSF8*-silencing pepper plants  
 311 showed lower Fv/Fm or  $\Delta F/Fm$  upon ETHH (42 °C, 90% humidity) compared to the wild type  
 312 control plants. **g**, *CaHSF8*-silenced pepper plants accumulated higher level of H<sub>2</sub>O<sub>2</sub>  
 313 accumulation displayed by DAB staining upon ETHH (42 °C, 90% humidity) treatment. In **a**, **c**,  
 314 and **f**, source data are provided as a Source Data file.

315



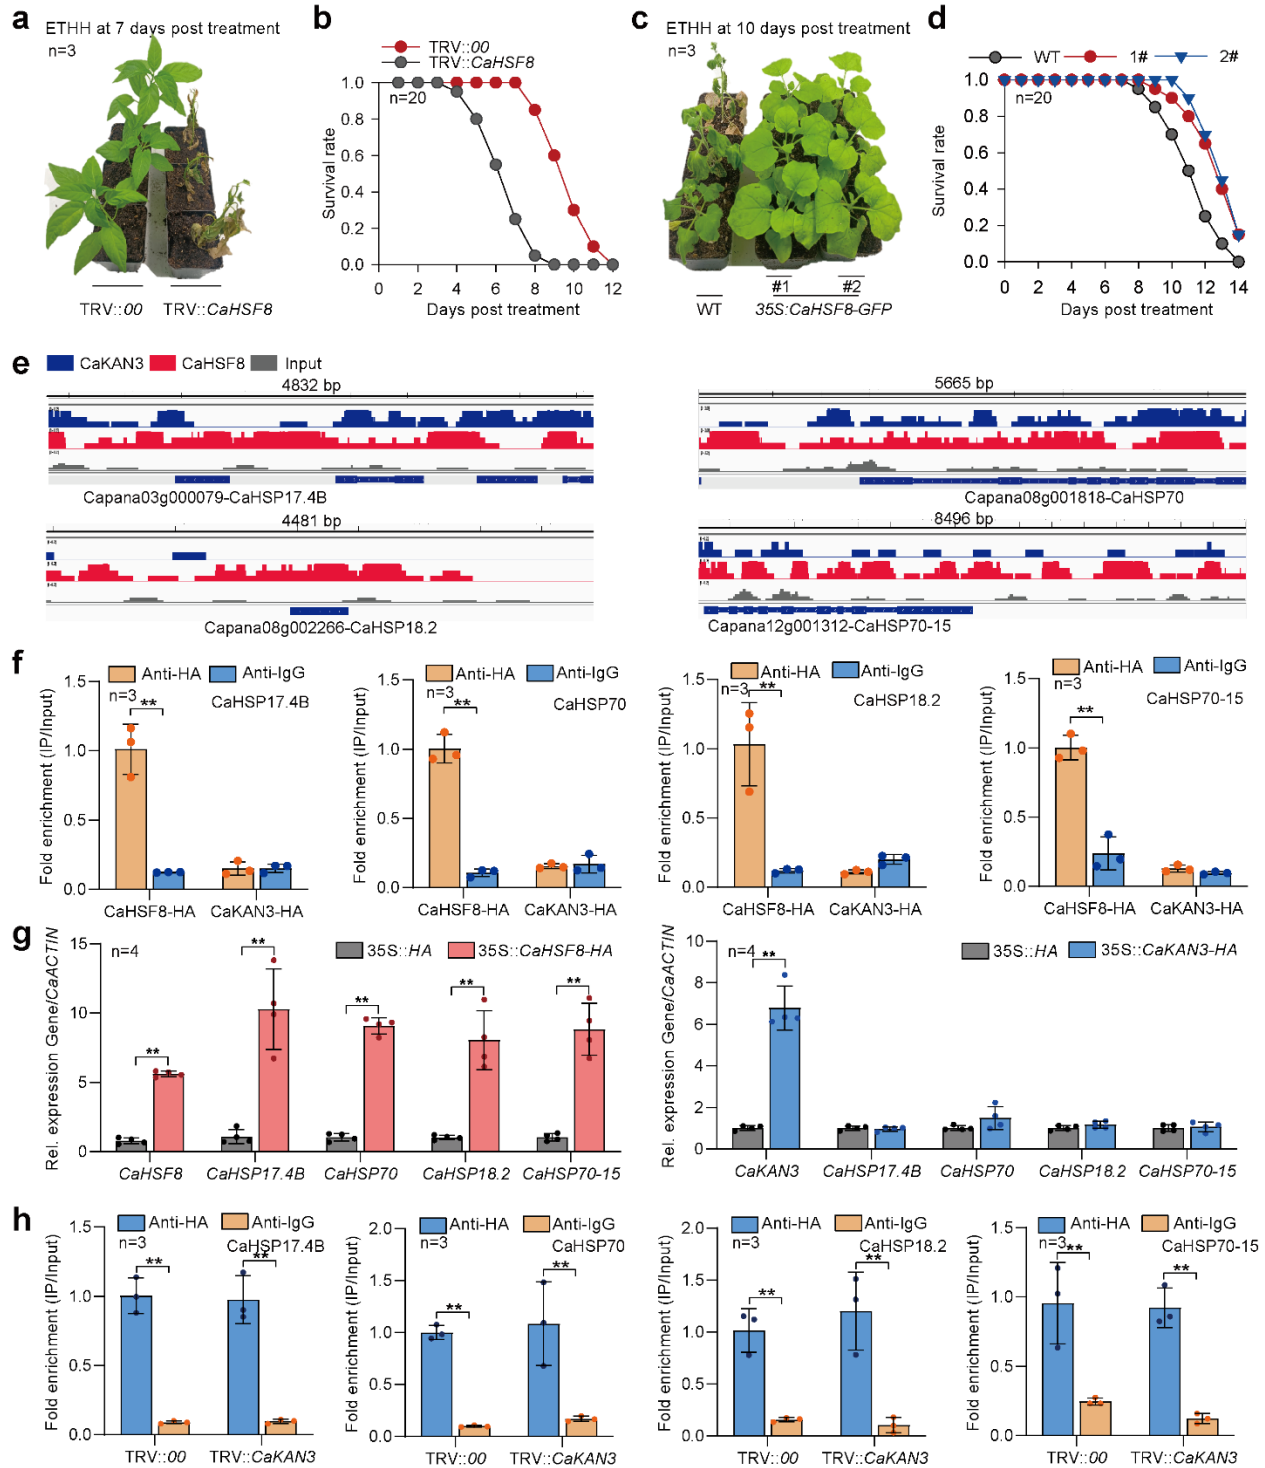

316

317 **Supplementary Data Fig.20|Direct regulation of a subset of HSP genes by CaHSF8 alone in**  
 318 **pepper plants upon ETHH.** **a**, *CaHSF8* silencing pepper plants displayed reduced  
 319 thermotolerance upon ETHH (42 °C, 90% humidity). **b**, Mortality of pepper plants upon ETHH  
 320 from 0 to 12 dpt (days post-treatment). **c**, *CaHSF8* overexpressing *N. benthamiana* plants  
 321 displayed increased thermotolerance upon ETHH compared to the wild type control plants. **d**,

322 Mortality of the two *CaHSF8* overexpressing *N. benthamiana* lines, *CaHSF8#1* and *CaHSF8#2*  
323 upon ETHH, 12 plants of each line were calculated. **e**, Integrative Genomics Viewer (IGV)  
324 images of ChIP-seq showed that the promoters of *CaHSP17.4B*, *CaHSP70*, *CaHSP18.2* and  
325 *CaHSP70-5* were targeted by CaHSF8. **f**, The data from ChIP-qPCR showed that *CaHSP17.4B*,  
326 *CaHSP70*, *CaHSP18.2* and *CaHSP70* were directly targeted by CaHSF8. The relative  
327 enrichment of Anti-HA/CaHSF8-HA was set to a value of 1 after normalization by input. Data  
328 are shown as the means  $\pm$  standard errors of three replicates. Asterisks above the bars indicate  
329 significant differences between means ( $P < 0.01$ ), as calculated with a t test. **g**, *CaHSP17.4B*,  
330 *CaHSP70*, *CaHSP18.2* and *CaHSP70-5* are upregulated by the transient overexpression of  
331 *CaHSF8* in pepper leaves. Data are shown as the means  $\pm$  standard errors of four replicates.  
332 Asterisks above the bars indicate significant differences between means ( $P < 0.01$ ), as calculated  
333 with a t test. **h**, The silencing of *CaKAN3* did not reduce the targeting of *CaHSP17.4B*,  
334 *CaHSP70*, *CaHSP18.2* and *CaHSP70-5* by CaHSF8. The relative enrichment of Anti-  
335 HA/TRV::00 was set to a value of 1 after normalization by input. Data are shown as the means  $\pm$   
336 standard errors of three replicates. Asterisks above the bars indicate significant differences  
337 between means ( $P < 0.01$ ), as calculated with a t test. In **a**, to **d**, the experiments were carried out  
338 twice with similar results. In **b**, **d**, **f**, **g**, and **h**, source data are provided as a Source Data file.  
339

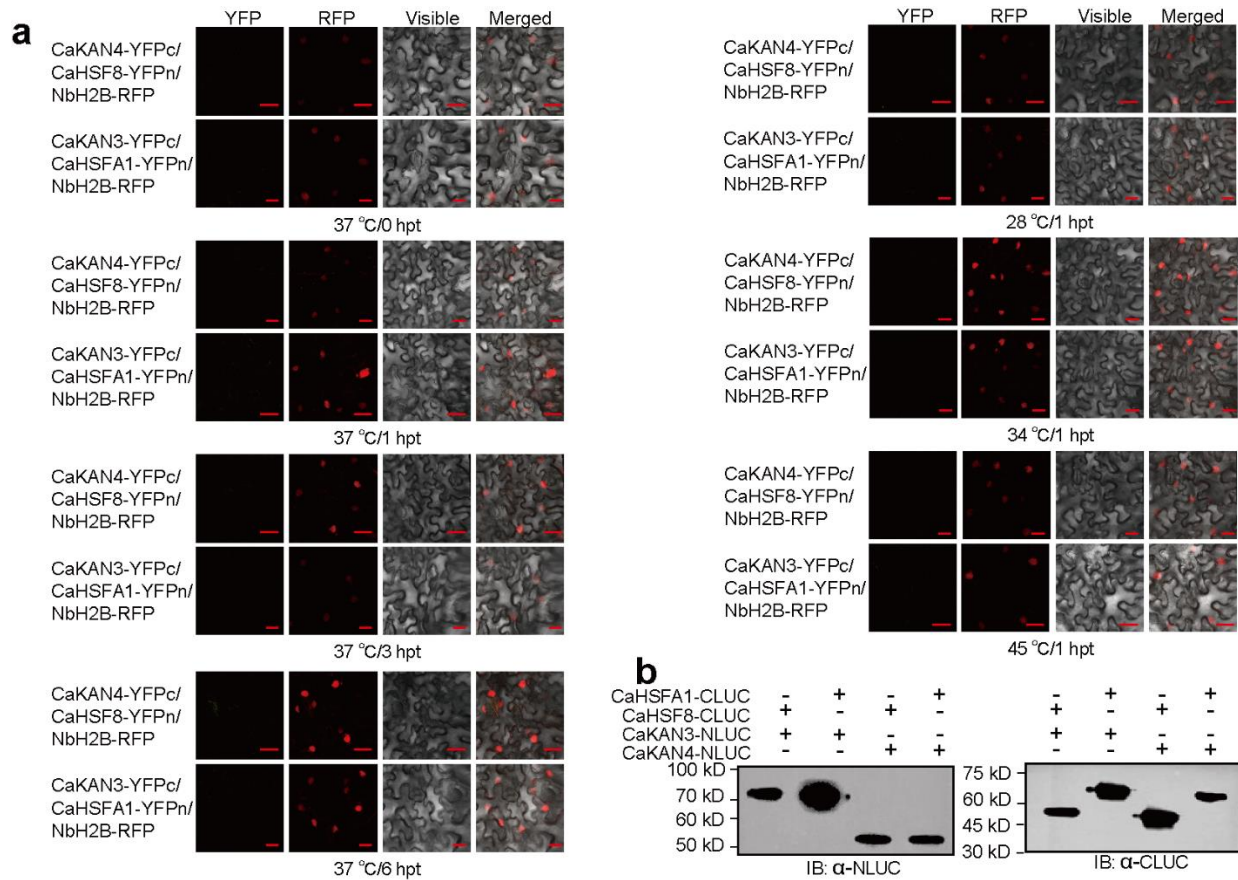

340

341 **Supplementary Data Fig.21| The negative controls in Fig. 5a and the success confirmation**  
 342 **of transient overexpression in Fig. 5b. a,** The negative controls in BiFC assay in Fig. 5a. **b,**  
 343 The success of transient overexpression of CaHSFA1-GLUC,CaHSF8-CLUC, CaKAN3-NLUC  
 344 and CaKAN4-NLUC in pepper leaves by immunoblotting using antibody of NLUC or CLUC in  
 345 Fig. 5b. The experiment was carried out once.

346

347

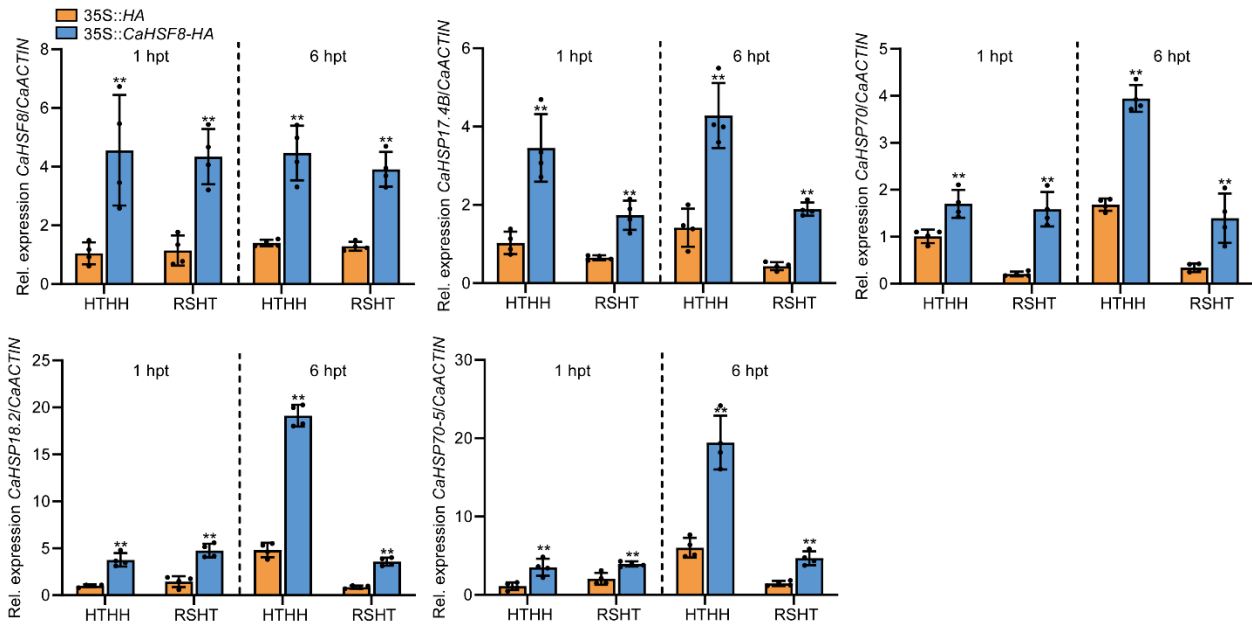

349

350 **Supplementary Data Fig.22|Transient overexpression of CaHSF8 clearly upregulated the**  
 351 **four HSP genes in pepper plants challenged HTHH or RSHT at 1 and 6 hpt.** The effect of  
 352 transient overexpression of CaHSF8 on the transcript levels of HSPs in pepper leaves upon  
 353 HTHH or RSHT at 1 and 6 hpt by RT-qPCR. The transcript levels of 35S:00 plants upon HTHH  
 354 at 1 hpt were set to 1, and *CaActin* was used as an internal control. Data are shown as the means  $\pm$   
 355 standard errors of four replicates. Asterisks above the bars indicate significant differences  
 356 between means ( $P < 0.01$ ), as calculated with a t test. Source data are provided as a Source Data  
 357 file.

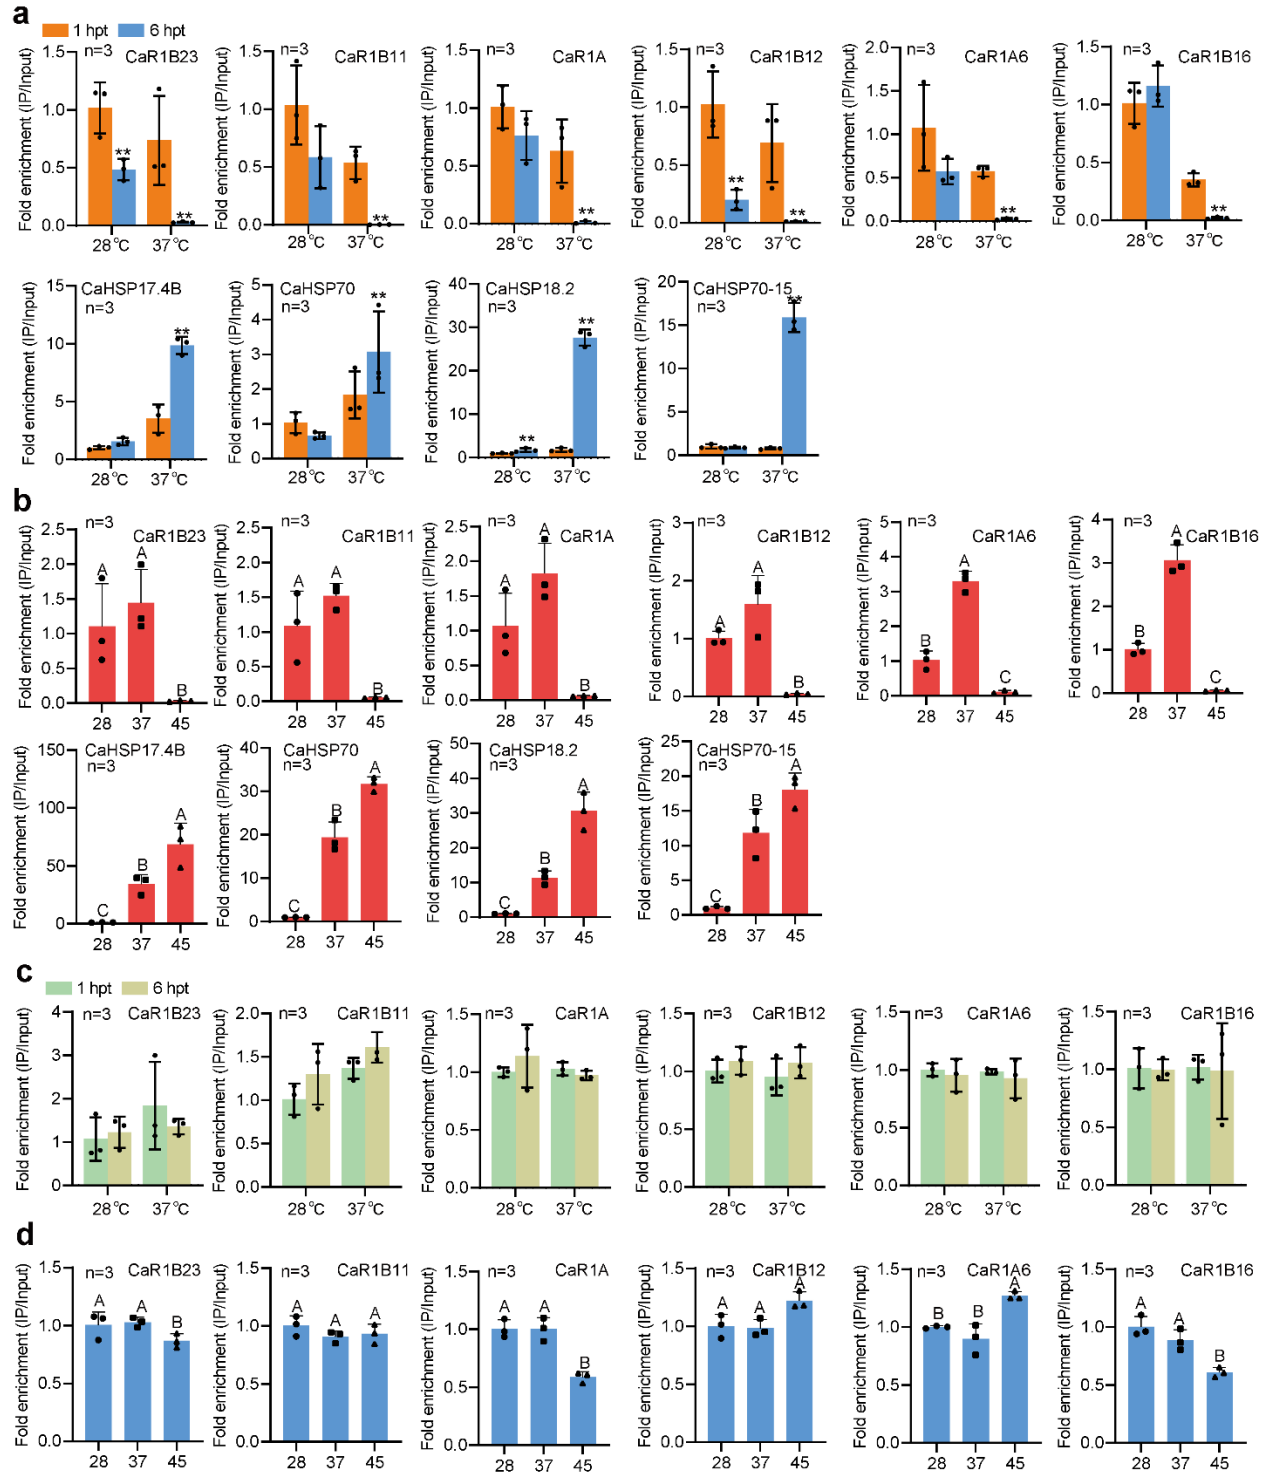

358

359 **Supplementary Data Fig.23|Enrichment of CaKAN3 and CaHSF8 to the promoters of NLR**  
 360 **and HSP genes upon RTHH and HTHH at 1 and 6 hpt or at 1 hpt upon different**  
 361 **temperature (28 °C, 37 °C, and 45 °C, 90% humidity). a, The enrichment of CaHSF8 in the**  
 362 **promoters of the 6 NLR genes and 4 HSP genes, the chromatin used for ChIP-qPCR were**  
 363 **isolated from CaHSF8 transiently overexpressing pepper plants challenged with RTHH (28 °C,**

364 90% humidity) and HTHH (37 °C, 90% humidity) at 1 and 6 hpt, the relative enrichment in  
365 pepper plants upon RTHH at 1 hpt was set to a value of 1 after normalization by input. Asterisks  
366 above the bars indicate significant differences between means ( $P < 0.01$ ), as calculated with a t  
367 test. **b**, The enrichment of CaHSF8 in the promoters of the 6 tested NLR genes and 4 tested HSP  
368 genes, the chromatins used for ChIP-qPCR were isolated from leaves of pepper plants upon  
369 RTHH, HTHH or ETHH (45 °C, 90% humidity) at 1 hpt, the relative enrichment of CaHSF8 in  
370 the promoters upon RTHH at 1 hpt was set to a value of 1 after normalization by input. **c**, The  
371 enrichment of CaKAN3 in the promoters of the 6 NLR genes, the chromatins used for ChIP-  
372 qPCR were isolated from CaKAN3 transiently overexpressing pepper plants challenged with  
373 RTHH or HTHH at 1 and 6 hpt. The relative enrichment of CaKAN3 to the six tested promoters  
374 upon RTHH at 1 hpt was set to a value of 1 after normalization by input. **d**, The enrichment of  
375 CaKAN3 in the promoters of the 6 tested NLR genes, the chromatins used for ChIP-qPCR were  
376 isolated from leaves of pepper plants upon RTHH or HTHH at 1 hpt, the relative enrichment of  
377 KAN3 to the 6 tested NLR gene upon RTHH at 1 hpt was set to a value of 1 after normalization  
378 by input. In **a** to **d**, data were shown as the means  $\pm$  standard errors of three replicates; different  
379 capital letters above the bars indicate significant differences ( $P < 0.01$ ) by Fisher's protected LSD  
380 test. In **a**, and **b**, the experiments were carried out twice with similar results. In **a**, to **d**, source  
381 data are provided as a Source Data file.

382

383

384 **References**

385 1 Yang, S. *et al.* Solanaceous plants switch to cytokinin-mediated immunity against *Ralstonia*  
386 *solanacearum* under high temperature and high humidity. *Plant, cell & environment***45**,  
387 459-478, doi:10.1111/pce.14222 (2022).

388 2 Dang, F. *et al.* CaWRKY40, a WRKY protein of pepper, plays an important role in the  
389 regulation of tolerance to heat stress and resistance to *Ralstonia solanacearum* infection.  
390 *Plant, cell & environment***36**, 757-774, doi:10.1111/pce.12011 (2013).

391 3 Shen, L. *et al.* Pepper CabZIP63 acts as a positive regulator during *Ralstonia solanacearum*  
392 or high temperature-high humidity challenge in a positive feedback loop with CaWRKY40.  
393 *Journal of experimental botany***67**, 2439-2451, doi:10.1093/jxb/erw069 (2016).

394
